# Supplementary material for: Long promoter sequences form higher-order G-quadruplexes: an integrative structural biology study of c-Myc, k-Ras and c-Kit promoter sequences
Source: PubMed Central journal article supplement (PMC9023277; doi:10.1093/nar/gkac182), 2022-03-23
Supplement: gkac182_supplemental_file.pdf [file gkac182_supplemental_file.pdf]

## Supplemental Material:

### Long promoter sequences form higher-order G-quadruplexes: An Integrative structural biology study of *c-Myc*, *k-Ras*, and *c-Kit* promoter sequences

Robert C. Monsen<sup>1</sup>, Lynn W. DeLeeuw<sup>1</sup>, William L. Dean<sup>1</sup>, Robert D. Gray<sup>1</sup>, Srinivas Chakravarthy<sup>2</sup>, Jesse B. Hopkins<sup>2</sup>, Jonathan B. Chaires<sup>\*1,3,4</sup>, and John O. Trent<sup>\*1,3,4</sup>

<sup>1</sup>UofL Health Brown Cancer Center, University of Louisville, 505 S. Hancock St., Louisville, KY 40202 USA

<sup>2</sup>The Biophysics Collaborative Access Team (BioCAT), Department of Biological, Chemical, and Physical Sciences, Illinois Institute of Technology, Chicago, IL 60616, USA

<sup>3</sup>Department of Medicine, University of Louisville, Louisville, KY 40202, USA

<sup>4</sup>Department of Biochemistry and Molecular Genetics, University of Louisville, Louisville, KY 40202, USA

#### Contents:

Table S1. Qualitative literature summary of CD signatures for short promoter sequences with or without 5' flanking residues. Red highlights the 5' flanked sequences that aren't parallel. Black indicates sequences that are not 5' flanked that are not parallel. Blue highlights 5' flanked sequences with at least partial parallel characteristics.

Table S2. *Quadparser* analysis of promoter potential quadruplex sequences (PQS) in the human genome.

Table S3. Tabulated small-angle X-ray scattering data acquisition, reduction, analysis, results and SASBDB identifiers.

Table S4. Tabulated small-angle X-ray scattering data acquisition, reduction, analysis, results and SASBDB identifiers of oligonucleotides from the PDB used in CRY SOL  $R_g$  regression.

Table S5. Tabulated hydrodynamic results from SAXS-derived ab initio bead models.

S1. SAXS data summary for *c-Myc*-8. a) Series intensity (blue, left axis) vs. frame, and, if available,  $R_g$  vs. frame (red, right axis). Green shaded regions are buffer regions, purple shaded regions are sample regions. b) Scattering profile(s) on a log-lin scale. c) Guinier fit(s) (top) and fit residuals (bottom). d) Normalized Kratky plot. Dashed lines show where a globular system would peak. Figure created in BioXTAS RAW v2.1.1.

S2. SAXS data summary for *c-Myc*-12. a) Series intensity (blue, left axis) vs. frame, and, if available,  $R_g$  vs. frame (red, right axis). Green shaded regions are buffer regions, purple shaded regions are sample regions. b) Scattering profile(s) on a log-lin scale. c) Guinier fit(s) (top) and fit residuals (bottom). d) Normalized Kratky plot. Dashed lines show where a globular system would peak. Figure created in BioXTAS RAW v2.1.1.

S3. SAXS data summary for *c-Myc*-12 Post-DNaseI. a) Series intensity (blue, left axis) vs. frame, and, if available,  $R_g$  vs. frame (red, right axis). Green shaded regions are buffer regions, purple shaded regions are sample regions. b) Scattering profile(s) on a log-lin scale. c) Guinier fit(s) (top) and fit residuals (bottom). d) Normalized Kratky plot. Dashed lines show where a globular system would peak. e)  $P(r)$  function(s), normalized by  $I(0)$ . Figure created in BioXTAS RAW v2.1.1.

S4. SAXS data summary for c-Kit-8. a) Series intensity (blue, left axis) vs. frame, and, if available,  $R_g$  vs. frame (red, right axis). Green shaded regions are buffer regions, purple shaded regions are sample regions. b) Scattering profile(s) on a log-lin scale. c) Guinier fit(s) (top) and fit residuals (bottom). d) Normalized Kratky plot. Dashed lines show where a globular system would peak. Figure created in BioXTAS RAW v2.1.1.

S5. SAXS data summary for c-Kit-12. a) Series intensity (blue, left axis) vs. frame, and, if available,  $R_g$  vs. frame (red, right axis). Green shaded regions are buffer regions, purple shaded regions are sample regions. b) Scattering profile(s) on a log-lin scale. c) Guinier fit(s) (top) and fit residuals (bottom). d) Normalized Kratky plot. Dashed lines show where a globular system would peak. Figure created in BioXTAS RAW v2.1.1.

S6. SAXS data summary for c-Kit-12 Post-DNaseI. a) Series intensity (blue, left axis) vs. frame, and, if available,  $R_g$  vs. frame (red, right axis). Green shaded regions are buffer regions, purple shaded regions are sample regions. b) Scattering profile(s) on a log-lin scale. c) Guinier fit(s) (top) and fit residuals (bottom). d) Normalized Kratky plot. e) Normalized Pr distribution. Dashed lines show where a globular system would peak. Figure created in BioXTAS RAW v2.1.1.

S7. SAXS data summary for k-Ras-8 Post-DNaseI. a) Series intensity (blue, left axis) vs. frame, and, if available,  $R_g$  vs. frame (red, right axis). Green shaded regions are buffer regions, purple shaded regions are sample regions. b) Scattering profile(s) on a log-lin scale. c) Guinier fit(s) (top) and fit residuals (bottom). d) Normalized Kratky plot. Dashed lines show where a globular system would peak. Figure created in BioXTAS RAW v2.1.1.

S8. SAXS data summary for 1XAV. a) Series intensity (blue, left axis) vs. frame, and, if available,  $R_g$  vs. frame (red, right axis). Green shaded regions are buffer regions, purple shaded regions are sample regions. b) Scattering profile(s) on a log-lin scale. c) Guinier fit(s) (top) and fit residuals (bottom). d) Normalized Kratky plot. Dashed lines show where a globular system would peak. e)  $P(r)$  function(s), normalized by  $I(0)$ . Figure created in BioXTAS RAW v2.1.1.

S9. SAXS data summary for 2GKU. a) Series intensity (blue, left axis) vs. frame, and, if available,  $R_g$  vs. frame (red, right axis). Green shaded regions are buffer regions, purple shaded regions are sample regions. b) Scattering profile(s) on a log-lin scale. c) Guinier fit(s) (top) and fit residuals (bottom). d) Normalized Kratky plot. Dashed lines show where a globular system would peak. e)  $P(r)$  function(s), normalized by  $I(0)$ . Figure created in BioXTAS RAW v2.1.1.

S10. SAXS data summary for 2JSL. a) Series intensity (blue, left axis) vs. frame, and, if available,  $R_g$  vs. frame (red, right axis). Green shaded regions are buffer regions, purple shaded regions are sample regions. b) Scattering profile(s) on a log-lin scale. c) Guinier fit(s) (top) and fit residuals (bottom). d) Normalized Kratky plot. Dashed lines show where a globular system would peak. e)  $P(r)$  function(s), normalized by  $I(0)$ . Figure created in BioXTAS RAW v2.1.1.

S11. SAXS data summary for 2KQG. a) Series intensity (blue, left axis) vs. frame, and, if available,  $R_g$  vs. frame (red, right axis). Green shaded regions are buffer regions, purple shaded regions are sample regions. b) Scattering profile(s) on a log-lin scale. c) Guinier fit(s) (top) and fit residuals (bottom). d) Normalized Kratky plot. Dashed lines show where a globular system would peak. e)  $P(r)$  function(s), normalized by  $I(0)$ . Green (029\_2), orange (029\_1), and blue (029\_0) species are the result of deconvolution using

evolving factor analysis(1). The monomeric species, as determined by approximate molecular weight ( $V_c$ ), is shown in green. Figure created in BioXTAS RAW v2.1.1.

S12. SAXS data summary for 2KZD. a) Series intensity (blue, left axis) vs. frame, and, if available,  $R_g$  vs. frame (red, right axis). Green shaded regions are buffer regions, purple shaded regions are sample regions. b) Scattering profile(s) on a log-lin scale. c) Guinier fit(s) (top) and fit residuals (bottom). d) Normalized Kratky plot. Dashed lines show where a globular system would peak. e)  $P(r)$  function(s), normalized by  $I(0)$ . Figure created in BioXTAS RAW v2.1.1.

S13. SAXS data summary for 2KZE. a) Series intensity (blue, left axis) vs. frame, and, if available,  $R_g$  vs. frame (red, right axis). Green shaded regions are buffer regions, purple shaded regions are sample regions. b) Scattering profile(s) on a log-lin scale. c) Guinier fit(s) (top) and fit residuals (bottom). d) Normalized Kratky plot. Dashed lines show where a globular system would peak. e)  $P(r)$  function(s), normalized by  $I(0)$ . Figure created in BioXTAS RAW v2.1.1.

S14. SAXS data summary for 2LBY. a) Series intensity (blue, left axis) vs. frame, and, if available,  $R_g$  vs. frame (red, right axis). Green shaded regions are buffer regions, purple shaded regions are sample regions. b) Scattering profile(s) on a log-lin scale. c) Guinier fit(s) (top) and fit residuals (bottom). d) Normalized Kratky plot. Dashed lines show where a globular system would peak. e)  $P(r)$  function(s), normalized by  $I(0)$ . Green (027\_2), orange (027\_1), and blue (027\_0) species are the result of deconvolution using evolving factor analysis(1). The monomeric species, as determined by approximate molecular weight ( $V_c$ ), is shown in green. Figure created in BioXTAS RAW v2.1.1.

S15. SAXS data summary for 2M27. a) Series intensity (blue, left axis) vs. frame, and, if available,  $R_g$  vs. frame (red, right axis). Green shaded regions are buffer regions, purple shaded regions are sample regions. b) Scattering profile(s) on a log-lin scale. c) Guinier fit(s) (top) and fit residuals (bottom). d) Normalized Kratky plot. Dashed lines show where a globular system would peak. e)  $P(r)$  function(s), normalized by  $I(0)$ . Orange (031\_1), and blue (031\_0) species are the result of deconvolution using evolving factor analysis(1). The monomeric species, as determined by approximate molecular weight ( $V_c$ ), is shown in orange. Figure created in BioXTAS RAW v2.1.1.

S16. SAXS data summary for 5CMX. a) Series intensity (blue, left axis) vs. frame, and, if available,  $R_g$  vs. frame (red, right axis). Green shaded regions are buffer regions, purple shaded regions are sample regions. b) Scattering profile(s) on a log-lin scale. c) Guinier fit(s) (top) and fit residuals (bottom). d) Normalized Kratky plot. Dashed lines show where a globular system would peak. e)  $P(r)$  function(s), normalized by  $I(0)$ . Figure created in BioXTAS RAW v2.1.1.

S17. SAXS data summary for 5I2V. a) Series intensity (blue, left axis) vs. frame, and, if available,  $R_g$  vs. frame (red, right axis). Green shaded regions are buffer regions, purple shaded regions are sample regions. b) Scattering profile(s) on a log-lin scale. c) Guinier fit(s) (top) and fit residuals (bottom). d) Normalized Kratky plot. Dashed lines show where a globular system would peak. e)  $P(r)$  function(s), normalized by  $I(0)$ . Figure created in BioXTAS RAW v2.1.1.

S18. SAXS data summary for 6GH0. a) Series intensity (blue, left axis) vs. frame, and, if available,  $R_g$  vs. frame (red, right axis). Green shaded regions are buffer regions, purple shaded regions are sample regions. b) Scattering profile(s) on a log-lin scale. c) Guinier fit(s) (top) and fit residuals (bottom). d) Normalized Kratky plot. Dashed lines show where a globular system would peak. e)  $P(r)$  function(s), normalized by

I(0). Green (035\_2), orange (031\_1), and blue (031\_0) species are the result of deconvolution using evolving factor analysis(1). The monomeric species, as determined by approximate molecular weight ( $V_c$ ), is shown in green. Figure created in BioXTAS RAW v2.1.1.

S19. SAXS data summary for 6L92. a) Series intensity (blue, left axis) vs. frame, and, if available,  $R_g$  vs. frame (red, right axis). Green shaded regions are buffer regions, purple shaded regions are sample regions. b) Scattering profile(s) on a log-lin scale. c) Guinier fit(s) (top) and fit residuals (bottom). d) Normalized Kratky plot. Dashed lines show where a globular system would peak. e)  $P(r)$  function(s), normalized by  $I(0)$ . Orange (031\_1), and blue (031\_0) species are the result of deconvolution using evolving factor analysis(1). The monomeric species, as determined by approximate molecular weight ( $V_c$ ), is shown in orange. Figure created in BioXTAS RAW v2.1.1.

S20. SAXS data summary for 6NEB. a) Series intensity (blue, left axis) vs. frame, and, if available,  $R_g$  vs. frame (red, right axis). Green shaded regions are buffer regions, purple shaded regions are sample regions. b) Scattering profile(s) on a log-lin scale. c) Guinier fit(s) (top) and fit residuals (bottom). d) Normalized Kratky plot. Dashed lines show where a globular system would peak. e)  $P(r)$  function(s), normalized by  $I(0)$ . Figure created in BioXTAS RAW v2.1.1.

S21. SAXS data summary for 201D. a) Series intensity (blue, left axis) vs. frame, and, if available,  $R_g$  vs. frame (red, right axis). Green shaded regions are buffer regions, purple shaded regions are sample regions. b) Scattering profile(s) on a log-lin scale. c) Guinier fit(s) (top) and fit residuals (bottom). d) Normalized Kratky plot. Dashed lines show where a globular system would peak. e)  $P(r)$  function(s), normalized by  $I(0)$ . Figure created in BioXTAS RAW v2.1.1.

Figure S22. CRYSOLOG v2.8.3 fits of the 14 G4s from the PDB used in building the  $R_g$  regression. PDB ID's are: (a) 1XAV, (b) 2GKU, (c) 2JSL, (d) 2KQG, (e) 2KZD, (f) 2KZE, (g) 2LBY, (h) 2M27, (i) 5CMX, (j) 5I2V, (k) 6GH0, (l) 6L92, (m) 6NEB, (n) 201D. Tabulated results for the fits are given in Table S4. Figure created in BioXTAS RAW v2.1.1.

Figure S23. Mfold analysis of cMyc-8.

Figure S24. Mfold analysis of cKit-8.

Figure S25. Mfold analysis of kRas-8.

Figure S26. Mfold analysis of cMyc-12.

Figure S27. Mfold analysis of cKit-12.

Figure S28. 1D proton NMR analysis of MYC-12. Red lines are integrations of the Watson-Crick and G-quadruplex imino proton regions, yielding a ratio of ~18:1 G-tetrad imino protons to duplex (Watson-Crick face) imino protons.

Figure S29. CD spectra of extended promoter sequences with 5' flanking nucleotides.

| Gene/Name  | Spectrum            | 5' flanked? | Length (nt) | Ref     |
|------------|---------------------|-------------|-------------|---------|
| BCL-2      | parallel            | Y           | 39          | (2)     |
| VEGF       | parallel            | Y           | 25          | (3)     |
| Hif1a      | parallel            | Y           | 31          | (4)     |
| c-MYB      | parallel            | N           | 42          | (5)     |
| PDGF-A     | parallel            | Y           | 48          | (6)     |
| AR         | parallel            | N           | 33          | (7)     |
| RET        | parallel            | Y           | 20          | (8)     |
| EGFR       | mixture             | N           | 30          | (9)     |
| PARP1      | antiparallel/hybrid | Y           | 23          | (10)    |
| WNT1       | parallel/mix        | N           | 22          | (11,12) |
| MyoD       | parallel            | Y           | 26          | (13)    |
| CLIC4      | antiparallel/hybrid | N           | 31-33       | (14)    |
| RAD17      | hybrid              | Y           | 24          | (15)    |
| RAD17      | parallel            | N           | 19          | (15)    |
| PCNA       | parallel            | Y           | 26-34       | (16)    |
| Yin Yang1  | parallel            | N           | 62          | (17)    |
| HSP90      | Parallel            | Y           | 27          | (18)    |
| HSP90      | Parallel/mix        | N           | 21          | (18)    |
| NPGPx      | parallel + hairpin  | Y           | 60          | (19)    |
| NPGPx-32   | parallel            | Y           | 32          | (19)    |
| UCP1       | parallel            | Y           | 24          | (20)    |
| MEST       | parallel            | Y           | 51          | (21)    |
| PCGF3      | parallel/mix        | N           | 21          | (22)    |
| TH49       | parallel/mix        | N           | 45          | (23)    |
| ALOX5      | parallel            | Y           | 43          | (24)    |
| VEGFR-2    | parallel/mix        | N           | 23          | (25)    |
| TKQ1       | antiparallel/hybrid | N           | 21          | (26)    |
| TKQ2       | antiparallel/hybrid | N           | 22          | (26)    |
| NRF2       | parallel            | N           | 24          | (27)    |
| MET        | parallel            | Y           | 23          | (28)    |
| c-MYC Pu19 | parallel            | Y           | 19          | (29)    |
| cKIT21     | parallel            | Y           | 21          | (30)    |
| cKIT18T    | parallel            | Y           | 18          | (30)    |
| cKIT21T    | parallel            | Y           | 21          | (30)    |
| FGFR2 S1   | parallel            | N           | 24          | (31)    |
| FGFR2 S2   | parallel/mix        | N           | 35          | (31)    |
| FGFR2 S3   | parallel            | N           | 22          | (31)    |

Table S1. Qualitative literature summary of CD signatures for short promoter sequences with or without 5' flanking residues. Red highlights the 5' flanked sequences that aren't parallel. Black indicates sequences that are not 5' flanked that are not parallel. Blue highlights 5' flanked sequences with at least partial parallel characteristics.

|                           | 2G, 4 runs |          |          |           | 3G, 4 runs |          |          |           |
|---------------------------|------------|----------|----------|-----------|------------|----------|----------|-----------|
|                           | 1-7 loop   | 1-8 loop | 1-9 loop | 1-10 loop | 1-7 loop   | 1-8 loop | 1-9 loop | 1-10 loop |
| Occurrence<br>-499 to 100 | 166808     | 178795   | 187996   | 194846    | 21112      | 24292    | 27337    | 29992     |
| Gene<br>-499 to 100       | 28160      | 28430    | 28660    | 28803     | 12752      | 13992    | 15077    | 15951     |
| % promoters               | 95.14      | 96.05    | 96.83    | 97.31     | 43.08      | 47.27    | 50.94    | 53.89     |
| Occurrence<br>-750 to 100 | 216564     | 233501   | 247240   | 257082    | 25716      | 29705    | 33552    | 36968     |
| Gene<br>-750 to 100       | 28674      | 28880    | 29052    | 29160     | 14051      | 15293    | 16383    | 17259     |
| % promoters               | 96.88      | 97.57    | 98.16    | 98.52     | 47.47      | 51.67    | 55.35    | 58.31     |

|                           | 2G, 8 runs |          |          |           | 3G, 8 runs |          |          |           |
|---------------------------|------------|----------|----------|-----------|------------|----------|----------|-----------|
|                           | 1-7 loop   | 1-8 loop | 1-9 loop | 1-10 loop | 1-7 loop   | 1-8 loop | 1-9 loop | 1-10 loop |
| Occurrence<br>-499 to 100 | 33551      | 40663    | 47181    | 53587     | 1508       | 1982     | 2469     | 3007      |
| Gene<br>-499 to 100       | 16996      | 18896    | 20451    | 21730     | 1380       | 1788     | 2220     | 2641      |
| % promoters               | 57.42      | 63.8     | 69.1     | 73.4      | 4.7        | 6        | 7.5      | 8.9       |
| Occurrence<br>-750 to 100 | 40653      | 49566    | 58048    | 66307     | 1754       | 2301     | 2901     | 3521      |
| Gene<br>-750 to 100       | 18136      | 19972    | 21560    | 22782     | 1564       | 2014     | 2514     | 2987      |
| % promoters               | 61.27      | 67.48    | 72.84    | 76.97     | 5.28       | 6.8      | 8.49     | 10.09     |

|                           | 2G, 12 runs |          |          |           | 3G, 12 runs |          |          |           |
|---------------------------|-------------|----------|----------|-----------|-------------|----------|----------|-----------|
|                           | 1-7 loop    | 1-8 loop | 1-9 loop | 1-10 loop | 1-7 loop    | 1-8 loop | 1-9 loop | 1-10 loop |
| Occurrence<br>-499 to 100 | 10153       | 13327    | 16629    | 20012     | 233         | 351      | 470      | 600       |
| Gene<br>-499 to 100       | 7653        | 9548     | 11342    | 13058     | 228         | 339      | 448      | 568       |
| % promoters               | 25.86       | 32.26    | 38.32    | 44.12     | 0.77        | 1.15     | 1.51     | 1.92      |
| Occurrence<br>-750 to 100 | 12001       | 15874    | 19964    | 24155     | 269         | 410      | 545      | 697       |
| Gene<br>-750 to 100       | 8462        | 10507    | 12409    | 14188     | 261         | 393      | 513      | 651       |
| % promoters               | 28.59       | 35.5     | 41.93    | 47.94     | 0.88        | 1.33     | 1.73     | 2.2       |

Table S2. *Quadparser* analysis of promoter PQS in the human genome.

## (a) Sample Details.

|                                                                              | c-Myc-8                  | c-Myc-12                 | c-Myc-12 Post-DNaseI     | c-Kit-8                  | c-Kit-12                 | c-Kit-12 Post-DNaseI     | k-Ras-8                  |
|------------------------------------------------------------------------------|--------------------------|--------------------------|--------------------------|--------------------------|--------------------------|--------------------------|--------------------------|
| Organism                                                                     | synthetic                | synthetic                | synthetic                | synthetic                | synthetic                | synthetic                | synthetic                |
| Extinction coefficient (nearest neighbor approximation) ( $M^{-1} cm^{-1}$ ) | 354900                   | 731000                   |                          | 381800                   | 626800                   | n/a                      | 445300                   |
| vbar ( $cm^3/g$ ) (estimate)                                                 | 0.55                     | 0.55                     | 0.55                     | 0.55                     | 0.55                     | 0.55                     | 0.55                     |
| M from chemical composition (Da)                                             | 10976                    | 23218                    | 20600*                   | 12143                    | 20349                    | 14700*                   | 13755                    |
| SEC-SAXS column, 10 x 300 Superdex 75                                        |                          |                          |                          |                          |                          |                          |                          |
| Loading concentration (mg/ml)                                                | 6.6                      | 7.4                      | 2.3                      | 8.9                      | 4.3                      | 1.4                      | 6.5                      |
| Injection volume ( $\mu$ l)                                                  | 285                      | 330                      | 270                      | 275                      | 340                      | 230                      | 310                      |
| Flow rate (ml/min)                                                           | 0.7                      | 0.7                      | 0.6                      | 0.7                      | 0.7                      | 0.6                      | 0.7                      |
| Solvent (solvent blanks taken from SEC)                                      |                          |                          |                          |                          |                          | BPEK, 185 mM KCl, pH 7.2 | BPEK, 185 mM KCl, pH 7.2 |
| flowthrough prior to elution of protein)                                     | BPEK, 185 mM KCl, pH 7.2 | BPEK, 185 mM KCl, pH 7.2 | BPEK, 185 mM KCl, pH 7.2 | BPEK, 185 mM KCl, pH 7.2 | BPEK, 185 mM KCl, pH 7.2 | BPEK, 185 mM KCl, pH 7.2 | BPEK, 185 mM KCl, pH 7.2 |

\*Measured by AUC-SV

## (b) SAXS data-collection parameters.

|                                           |                                                                                                                                                                                                                                   |
|-------------------------------------------|-----------------------------------------------------------------------------------------------------------------------------------------------------------------------------------------------------------------------------------|
| Instrument/data processing                | BioCAT facility at the Advanced Photon Source beamline 18ID with Pilatus3 X 1M (Dectris) detector                                                                                                                                 |
| Wavelength ( $\text{\AA}$ )               | 1.033                                                                                                                                                                                                                             |
| Beam size ( $\mu$ m)                      | 150 (h) x 25 (v)                                                                                                                                                                                                                  |
| Camera length (m)                         | 3.628                                                                                                                                                                                                                             |
| q measurement range ( $\text{\AA}^{-1}$ ) | 0.0044-0.35                                                                                                                                                                                                                       |
| Absolute scaling method                   | Glassy Carbon, NIST SRM 3600<br>To incident intensity, by ion chamber counter                                                                                                                                                     |
| Normalization                             | Automated frame-by-frame comparison of relevant regions                                                                                                                                                                           |
| Monitoring for radiation damage           | 0.5 s exposure time with a 2s total exposure period (0.5 s on, 1.5 s off) of entire SEC elution.                                                                                                                                  |
| Exposure time, number of exposures        | SEC-SAXS. Size separation by an AKTA Pure with a Superdex 200 Increase 10/300 GL column and sheath flow cell(32) to minimize sample damage. SAXS data measured in a 1 mm ID quartz capillary with effective path length 0.542 mm. |
| Sample configuration                      |                                                                                                                                                                                                                                   |
| Sample temperature ( $^{\circ}$ C)        | R.T.                                                                                                                                                                                                                              |

## (c) Software employed for SAXS data reduction, analysis, and interpretation.

|                                                 |                                                                                                                       |
|-------------------------------------------------|-----------------------------------------------------------------------------------------------------------------------|
| SAXS data reduction                             | Radial averaging; frame comparison, averaging, and subtraction done using BioXTAS RAW 1.6.3 (Hopkins et al. 2017(33)) |
| Extinction coefficient estimate                 | Nearest neighbor approximation                                                                                        |
| Basic analyses: Guinier, P(r), Vp               | Guinier fit, P(r), Kratky analysis, and molecular weight using BioXTAS RAW 2.1.1 and GNOM(33,34)                      |
| Shape/bead modelling                            | DAMMIF/DAMAVAR/DAMCLUST/DAMMIN in BioXTAS RAW 2.1.1 (35-38)                                                           |
| Atomic structure modelling                      | CRY SOL v2.8.3 (39)                                                                                                   |
| Three-dimensional graphic model representations | UCSF Chimera v1.12                                                                                                    |

## (d) Structural parameters.

| Guinier analysis                                                | c-Myc-8            | c-Myc-12              | c-Myc-12 Post-DNaseI    | c-Kit-8            | c-Kit-12              | c-Kit-12 Post-DNaseI  | k-Ras-8               |
|-----------------------------------------------------------------|--------------------|-----------------------|-------------------------|--------------------|-----------------------|-----------------------|-----------------------|
| I(0) (cm <sup>-1</sup> )                                        | 0.0146 ± 0.0000128 | 0.0177 ± 0.0000269    | 0.6840 ± 0.00118        | 0.022 ± 0.000018   | 2.2415 ± 0.00162      | 0.2075 ± 0.00066      | 0.0214 ± 0.00001      |
| Rg (Å)                                                          | 14.35 ± 0.03       | 22.84 ± 0.06          | 19.45 ± 0.08            | 14.89 ± 0.02       | 24.29 ± 0.04          | 6                     | 8                     |
| qmin*Rg                                                         | 0.06               | 0.1                   | 0.06                    | 0.06               | 0.1                   | 15.78 ± 0.10          | 16.77 ± 0.03          |
| qmax*Rg                                                         | 1.3                | 1.3                   | 1.16                    | 1.3                | 1.09                  | 0.05                  | 0.13                  |
| χ <sup>2</sup>                                                  | 0.99               | 0.99                  | 0.98                    | 0.99               | 1.00                  | 1.35                  | 1.3                   |
| M (Da) from Vc (ratio to predicted)                             | 13300 (1.21)       | 24500 (1.06)          | 20700 (1.00)            | 14700 (1.21)       | 21700 (1.07)          | 0.93                  | 1.00                  |
|                                                                 |                    |                       |                         |                    |                       | 15300                 | 16100                 |
|                                                                 |                    |                       |                         |                    |                       | (1.04)                | (1.17)                |
| P(r) analysis                                                   |                    |                       |                         |                    |                       |                       |                       |
| I(0) (cm <sup>-1</sup> )                                        | 0.0146 ± 0.0000132 | 0.0179 ± 0.0000317    | 0.6918 ± 0.0011         | 0.022 ± 0.00002    | 2.2550 ± 0.00154      | 0.2096 ± 0.0006       | 0.0214 ± 0.00001      |
| Rg (Å)                                                          | 14.42 ± 0.0229     | 23.70 ± 0.07          | 20.33 ± 0.69            | 14.95 ± 0.02       | 25.10 ± 0.03          | 16.55 ± 0.06          | 98                    |
| Dmax (Å)                                                        | 46                 | 84                    | 65                      | 48                 | 86                    | 54                    | 56                    |
| χ <sup>2</sup>                                                  | 1.03               | 1.20                  | 1.50                    | 1.01               | 1.79                  | 1.44                  | 1.01                  |
| Porod volume (Å <sup>-3</sup> )                                 |                    |                       |                         |                    |                       | 12700                 | 14600                 |
| (ratio Vp/calculated M)                                         | 9500 (0.87)        | 27400 (1.18)          | 19600 (0.95)            | 11400 (0.94)       | 23900 (1.17)          | (0.86)                | (1.06)                |
| (e) Shape model-fitting results                                 |                    |                       |                         |                    |                       |                       |                       |
|                                                                 | c-Myc-8            | c-Myc-12              | c-Myc-12 Post-DNaseI    | c-Kit-8            | c-Kit-12              | c-Kit-12 Post-DNaseI  | k-Ras-8               |
| AMBIMETER (default parameters)                                  |                    |                       |                         |                    |                       |                       |                       |
| Number of compatible shape categories, (Ambiguity score)        | 10, (1.000)        | 51, (1.708)           | 183, (2.262)            | 12, (1.079)        | 200, (2.301)          | 142, (2.152)          | 34, (1.531)           |
|                                                                 |                    | potentially ambiguous | potentially ambiguous   | potentially unique | potentially ambiguous | potentially ambiguous | potentially ambiguous |
| 3D reconstruction                                               | potentially unique |                       |                         |                    |                       |                       |                       |
| DAMMIF (20x, slow mode), DAMAVER, DAMCLUST, DAMMIN (refinement) |                    |                       |                         |                    |                       |                       |                       |
| q range for fitting (Å <sup>-1</sup> )                          | 0.01-0.30          | 0.007-0.30            | 0.006-0.30              | 0.006-0.30         | 0.004-0.30            | 0.003-0.30            | 0.007-0.30            |
| Symmetry, anisotropy assumptions                                | P1, none           | P1, none              | P1, none                | P1, none           | P1, none              | P1, none              | P1, none              |
| Mean NSD ± STDEV                                                | 0.534 ± 0.017      | 1.688 ± 0.287         | 0.828 ± 0.087           | 0.583 ± 0.063      | 1.065 ± 0.096         | 0.799 ± 0.141         | 0.895 ± 0.17          |
| # Rejected models                                               | 1                  | 2                     | 1                       | 1                  | 2                     | 1                     | 2                     |
| # Clusters                                                      | 11                 | 9                     | 4                       | 4                  | 5                     | 4                     | 6                     |
| Ensemble Resolution (Å)                                         | 17 ± 2             | 37 ± 3                | 26 ± 2                  | 18 ± 2             | 30 ± 2                | 23 ± 2                | 23 ± 2                |
| χ <sup>2</sup>                                                  | 1.027              | 1.192                 | 1.505                   | 1.017              | 1.787                 | 1.434                 | 1.01                  |
| Rg (Å)                                                          | 14.43              | 23.74                 | 20.42                   | 14.97              | 25.12                 | 16.575                | 16.96                 |
| Dmax (Å)                                                        | 48                 | 88                    | 70                      | 50                 | 88                    | 58                    | 56                    |
| MW from Vc (kDa)                                                | 10.1               | 23.7                  | 20.1                    | 11.35              | 21.33                 | 13.01                 | 13.14                 |
| (f) Atomistic modelling.                                        |                    |                       |                         |                    |                       |                       |                       |
| Model                                                           | c-Myc-8            | c-Myc-12 (Hairpin)    | c-Myc-12 (All Parallel) | c-Kit-8            | c-Kit-12 (Hairpin)    | c-Kit-8               | k-Ras-8               |
| q range for all modelling                                       | 0.01-0.35          | 0.007-0.353           | 0.006-0.3491            | 0.006-0.35         | 0.004-0.353           | 0.003-0.3491          | 0.007-0.35            |
| CRY SOL v2.8.3                                                  |                    |                       |                         |                    |                       |                       |                       |
| χ <sup>2</sup>                                                  | 1.67               | 1.74                  | 3.4                     | 1.66               | 4.07                  | 1.18                  | 5.6                   |



|                                                         |                     |                     |                     |                     |                     |                     |                     |
|---------------------------------------------------------|---------------------|---------------------|---------------------|---------------------|---------------------|---------------------|---------------------|
| Calculated Rg (Å)                                       | 14.14               | 22.28               | 19.04               | 14.7                | 23.39               | 15.52               | 15.66               |
| Vol (Å <sup>3</sup> ), Ra (Å), Dro (e Å <sup>-3</sup> ) | 10341, 1.680, 0.075 | 17910, 1.400, 0.045 | 19937, 1.800, 0.045 | 11026, 1.800, 0.040 | 21061, 1.500, 0.075 | 13196, 1.620, 0.075 | 12136, 1.800, 0.060 |

(g) SASBDB IDs for data and models.

|    |         |         |         |         |         |             |             |
|----|---------|---------|---------|---------|---------|-------------|-------------|
| ID | SASDMJ6 | SASDMM6 | SASDM36 | SASDMK6 | SASDMN6 | SASDM4<br>6 | SASDML<br>6 |
|----|---------|---------|---------|---------|---------|-------------|-------------|

Table S3. Tabulated small-angle X-ray scattering data acquisition, reduction, analysis, results and SASBDB identifiers.

(a) SAXS  
Sample  
Details.

|                                                                                 | 2KZD             | 201D             | 6GH0             | 2GKU             | 2JSL             | 5I2V             | 6L92             | 2KQG             | 2LBY             | 6NEB             | 1XAV             | 2KZE             | 5CMX             | 2M27             |
|---------------------------------------------------------------------------------|------------------|------------------|------------------|------------------|------------------|------------------|------------------|------------------|------------------|------------------|------------------|------------------|------------------|------------------|
| Organism                                                                        | synthetic        | synthetic        | synthetic        | synthetic        | synthetic        | synthetic        | synthetic        | synthetic        | synthetic        | synthetic        | synthetic        | synthetic        | synthetic        | synthetic        |
| Source                                                                          | IDT              | IDT              | IDT              | IDT              | IDT              | IDT              | IDT              | IDT              | IDT              | IDT              | IDT              | IDT              | IDT              | IDT              |
| Extinction coefficient (nearest neighbor approximation) ( $M^{-2} cm^{-1}$ )    | 202900           | 241822           | 211000           | 244300           | 253100           | 233100           | 208000           | 206900           | 201700           | 272400           | 190394           | 202900           | 297500           | 200400           |
| vbar ( $cm^3/g$ ) (estimate)                                                    | 0.55             | 0.55             | 0.55             | 0.55             | 0.55             | 0.55             | 0.55             | 0.55             | 0.55             | 0.55             | 0.55             | 0.55             | 0.55             | 0.55             |
| M from chemical composition (Da)                                                | 6369             | 8856             | 6923             | 7575             | 7879             | 6970             | 6883             | 6618             | 6054             | 8547             | 6992             | 6369             | 9710             | 6905             |
| SEC-SAXS column, 10 x 300 Superdex 200                                          |                  |                  |                  |                  |                  |                  |                  |                  |                  |                  |                  |                  |                  |                  |
| Loading concentration (mg/ml)                                                   | 1.7              | 6.7              | 3.5              | 5                | 2.4              | 3.5              | 3.8              | 3.2              | 3.4              | 3.8              | 6.3              | 2.1              | 8.6              | 3.7              |
| Injection volume ( $\mu$ l)                                                     | 400              | 250              | 300              | 400              | 400              | 300              | 300              | 300              | 300              | 350              | 250              | 400              | 100              | 300              |
| Flow rate (ml/min)                                                              | 0.6              | 0.6              | 0.6              | 0.6              | 0.6              | 0.6              | 0.6              | 0.6              | 0.6              | 0.6              | 0.6              | 0.6              | 0.6              | 0.6              |
| Solvent (solvent blanks taken from SEC flowthrough prior to elution of protein) | BPEK, 185 mM KCl | BPEK, 185 mM KCl | BPEK, 185 mM KCl | BPEK, 185 mM KCl | BPEK, 185 mM KCl | BPEK, 185 mM KCl | BPEK, 185 mM KCl | BPEK, 185 mM KCl | BPEK, 185 mM KCl | BPEK, 185 mM KCl | BPEK, 185 mM KCl | BPEK, 185 mM KCl | BPEK, 185 mM KCl | BPEK, 185 mM KCl |

(b) SAXS data-collection parameters.

|                                           |                                                                                                   |
|-------------------------------------------|---------------------------------------------------------------------------------------------------|
| Instrument/data processing                | BioCAT facility at the Advanced Photon Source beamline 18ID with Pilatus3 X 1M (Dectris) detector |
| Wavelength ( $\text{\AA}$ )               | 1.033                                                                                             |
| Beam size ( $\mu$ m)                      | 150 (h) x 25 (v)                                                                                  |
| Camera length (m)                         | 3.655                                                                                             |
| q measurement range ( $\text{\AA}^{-1}$ ) | 0.0044-0.35                                                                                       |
| Absolute scaling method                   | Glassy Carbon, NIST SRM 3600                                                                      |

|                                    |                                                                                                                                                                                                                                   |
|------------------------------------|-----------------------------------------------------------------------------------------------------------------------------------------------------------------------------------------------------------------------------------|
| Normalization                      | To incident intensity, by ion chamber counter                                                                                                                                                                                     |
| Monitoring for radiation damage    | Automated frame-by-frame comparison of relevant regions                                                                                                                                                                           |
| Exposure time, number of exposures | 0.5 s exposure time with a 2s total exposure period (0.5 s on, 1.5 s off) of entire SEC elution                                                                                                                                   |
| Sample configuration               | SEC-SAXS. Size separation by an AKTA Pure with a Superdex 200 Increase 10/300 GL column and sheath flow cell(32) to minimize sample damage. SAXS data measured in a 1 mm ID quartz capillary with effective path length 0.542 mm. |
| Sample temperature (°C)            | 22                                                                                                                                                                                                                                |

(c) Software employed for SAXS data reduction, analysis, and interpretation.

|                                                 |                                                                                                                       |
|-------------------------------------------------|-----------------------------------------------------------------------------------------------------------------------|
| SAXS data reduction                             | Radial averaging; frame comparison, averaging, and subtraction done using BioXTAS RAW 1.6.3 (Hopkins et al. 2017(33)) |
| Extinction coefficient estimate                 | Nearest neighbor approximation                                                                                        |
| Basic analyses: Guinier, P(r), Vp               | Guinier fit, P(r), Kratky analysis, and molecular weight using BioXTAS RAW 2.1.1 and GNOM(33,34)                      |
| Shape/bead modelling                            | N/A                                                                                                                   |
| Atomic structure modelling                      | CRY SOL v2.8.3 (39)                                                                                                   |
| Three-dimensional graphic model representations | UCSF Chimera v1.12                                                                                                    |

(d) Structural parameters.

|                                            | 2KZD            | 201D             | 6GH0          | 2GKU             | 2JSL             | 5I2V           | 6L92           | 2KQG           | 2LBY            | 6NEB            | 1XAV                | 2KZE              | 5CMX               | 2M27            |
|--------------------------------------------|-----------------|------------------|---------------|------------------|------------------|----------------|----------------|----------------|-----------------|-----------------|---------------------|-------------------|--------------------|-----------------|
| <b>Guinier analysis</b>                    |                 |                  |               |                  |                  |                |                |                |                 |                 |                     |                   |                    |                 |
| I(0) (cm <sup>-1</sup> )                   | 0.92 ± 0.000987 | 0.01 ± 0.0000118 | 0.23 ± 0.0015 | 0.01 ± 0.0000188 | 0.02 ± 0.0000153 | 0.37 ± 0.00041 | 0.4 ± 0.000435 | 0.22 ± 0.00267 | 0.27 ± 0.000493 | 0.52 ± 0.000446 | 0.00889 ± 0.0000139 | 0.0068 ± 0.000013 | 0.00729 ± 0.000012 | 0.42 ± 0.000616 |
| Rg (Å)                                     | 11.7 ± 0.03     | 12.89 ± 0.03     | 10.4 ± 0.17   | 12.27 ± 0.04     | 12.13 ± 0.03     | 13.49 ± 0.03   | 11.76 ± 0.03   | 15.64 ± 0.44   | 12.15 ± 0.05    | 13.56 ± 0.02    | 12.63 ± 0.04        | 12.5 ± 0.05       | 15.44 ± 0.06       | 12.66 ± 0.04    |
| qmin*Rg                                    | 0.112           | 0.057            | 0.16          | 0.072            | 0.088            | 0.107          | 0.052          | 0.128          | 0.1             | 0.061           | 0.056               | 0.141             | 0.127              | 0.093           |
| qmax*Rg                                    | 1.259           | 1.144            | 1.287         | 1.258            | 1.146            | 1.276          | 1.268          | 1.214          | 1.268           | 1.275           | 1.25                | 1.267             | 1.268              | 1.245           |
| Coefficient of correlation, R <sup>2</sup> | 0.991           | 0.991            | 0.843         | 0.98             | 0.988            | 0.987          | 0.978          | 0.144          | 0.96            | 0.985           | 0.971               | 0.971             | 0.991              | 0.981           |

|                                                                                             |                    |                    |                       |                       |                       |                           |                           |                              |                              |                           |                        |                            |                            |                           |
|---------------------------------------------------------------------------------------------|--------------------|--------------------|-----------------------|-----------------------|-----------------------|---------------------------|---------------------------|------------------------------|------------------------------|---------------------------|------------------------|----------------------------|----------------------------|---------------------------|
| M (Da)<br>from Vc<br>P(r) analysis<br>(GNOM)                                                | 5800               | 7400               | 8400                  | 6500                  | 6700                  | 10700                     | 8900                      | 9400                         | 9000                         | 8100                      | 6800                   | 6300                       | 12800                      | 10300                     |
| I(0) (cm <sup>-1</sup> )                                                                    | 0.93 ± 0.000949    | 0.01 ± 0.0000147   | 0.24 ± 0.000568       | 0.01 ± 0.0000177      | 0.02 ± 0.0000185      | 0.37 ± 0.000452           | 0.4 ± 0.000486            | 0.2 ± 0.00166                | 0.27 ± 0.000502              | 0.52 ± 0.000439           | 0.00887 ± 0.0000143    | 0.00679 ± 0.0000127        | 0.00731 ± 0.0000112        | 0.42 ± 0.000596           |
| Rg (Å)                                                                                      | 11.73 ± 0.02       | 12.88 ± 0.03       | 11.24 ± 0.03          | 12.23 ± 0.03          | 12.2 ± 0.03           | 13.61 ± 0.04              | 11.81 ± 0.03              | 11.88 ± 0.1                  | 12.19 ± 0.03                 | 13.64 ± 0.02              | 12.56 ± 0.03           | 12.49 ± 0.04               | 15.68 ± 0.04               | 12.64 ± 0.03              |
| Dmax (Å)                                                                                    | 36                 | 41                 | 31                    | 38                    | 39                    | 49                        | 39                        | 32                           | 39                           | 45                        | 41                     | 42                         | 52                         | 38                        |
| χ <sup>2</sup>                                                                              | 1.386              | 0.99               | 3.032                 | 1.201                 | 1.354                 | 2.237                     | 1.961                     | 3.185                        | 2.098                        | 1.74                      | 1.28                   | 1.355                      | 1.032                      | 1.439                     |
| Porod<br>volume (Å <sup>-3</sup> )                                                          | 3460               | 5950               | 2260                  | 4500                  | 4670                  | 6030                      | 3440                      | 3100                         | 3740                         | 7000                      | 4940                   | 4320                       | 8980                       | 5260                      |
| <b>Ambimeter</b><br>Number of<br>compatible<br>shape<br>categories,<br>(Ambiguity<br>score) | 31 (1.49)          | 5 (0.7)            | 174 (2.24)            | 32 (1.5)              | 8 (0.9)               | 19 (1.28)                 | 2 (0.3)                   | 33 (1.52)                    | 113 (2.05)                   | 11 (1.04)                 | 20 (1.3)               | 69 (1.84)                  | 132 (2.12)                 | 12 (1.08)                 |
| 3D<br>reconstructi<br>on                                                                    | Potentially unique | Potentially unique | might be<br>ambiguous | might be<br>ambiguous | potentially<br>unique | potenti<br>ally<br>unique | potenti<br>ally<br>unique | might<br>be<br>ambigu<br>ous | might<br>be<br>ambigu<br>ous | potenti<br>ally<br>unique | potential<br>ly unique | might be<br>ambiguou<br>us | might be<br>ambiguou<br>us | potenti<br>ally<br>unique |
| (f) Atomistic<br>modelling.                                                                 |                    |                    |                       |                       |                       |                           |                           |                              |                              |                           |                        |                            |                            |                           |
| Model (PDB<br>ID)                                                                           | 2KZD               | 201D               | 6GH0                  | 2GKU                  | 2JSL                  | 5I2V                      | 6L92                      | 2KQG                         | 2LBY                         | 6NEB                      | 1XAV                   | 2KZE                       | 5CMX                       | 2M27                      |
| q range                                                                                     | 0.0096 - 0.3497    | 0.0044 - 0.3497    | 0.0154 - 0.35         | 0.0059 - 0.3497       | 0.0073 - 0.3497       | 0.0079 - 0.35             | 0.0045 - 0.35             | 0.0082 - 0.35                | 0.0082 - 0.35                | 0.0045 - 0.35             | 0.0044 - 0.3497        | 0.0113 - 0.3497            | 0.0082 - 0.35              | 0.0073 - 0.35             |
| <b>CRYSOL<br/>(constant<br/>subtraction<br/>allowed)</b>                                    |                    |                    |                       |                       |                       |                           |                           |                              |                              |                           |                        |                            |                            |                           |
| χ <sup>2</sup>                                                                              | 2.261              | 1.59               | 3.185                 | 1.166                 | 1.413                 | 2.943                     | 2.317                     | 3.215                        | 2.038                        | 3.103                     | 1.44                   | 1.428                      | 1.640                      | 1.642                     |
| Calculated<br>Rg (Å)                                                                        | 11.48              | 12.68              | 11.27                 | 12.03                 | 12.18                 | 12.98                     | 11.57                     | 12.04                        | 12.11                        | 13.15                     | 12.31                  | 12.47                      | 14.80                      | 12.47                     |
| Dro (e Å <sup>-3</sup> ),<br>Ra (Å)                                                         | 0.075, 1.52        | 0.065, 1.80        | 0.018, 1.80           | 0.072, 1.80           | 0.062, 1.80           | 0.075, 1.80               | 0.075, 1.80               | 0.070, 1.40                  | 0.043, 1.64                  | 0.075, 1.40               | 0.075, 1.80            | 0.075, 1.80                | 0.075, 1.40                | 0.075, 1.80               |
| (g) SASBDB<br>IDs for data<br>and models.                                                   |                    |                    |                       |                       |                       |                           |                           |                              |                              |                           |                        |                            |                            |                           |
| ID                                                                                          | SASDM56            | SASDM76            | SASDM86               | SASDM96               | SASDKF3               | SAS<br>DMA<br>6           | SAS<br>DMB<br>6           | SAS<br>DMC<br>6              | SASD<br>MD6                  | SASD<br>ME6               | SASD<br>MF6            | SASD<br>M66                | SASD<br>MG6                | SASD<br>MH6               |

Table S4. Tabulated small-angle X-ray scattering data acquisition, reduction, analysis, results and SASBDB identifiers of oligonucleotides from the PDB used in CRY SOL  $R_g$  regression.

|                                                 | c-Myc-8  |       |      | c-Myc-12 |       |      | c-Myc-12 Post-DNaseI |       |      |
|-------------------------------------------------|----------|-------|------|----------|-------|------|----------------------|-------|------|
| MW (Da)                                         | 10980    |       |      | 22250    |       |      | 20600                |       |      |
| Calculated volume (Å <sup>3</sup> ) (eq. 2 & 3) | 15842    |       |      | 32102    |       |      | 29721                |       |      |
| Avg vol per atom (from DAMMIN refine header)    | 11.06    |       |      | 152.80   |       |      | 30.34                |       |      |
| Calculated AER (eq. 4)                          | 1.38     |       |      | 3.32     |       |      | 1.93                 |       |      |
| Adjusted AER                                    | 1.18     |       |      | 2.60     |       |      | 1.49                 |       |      |
|                                                 | HYDROPRO | SAXS  | AUC  | HYDROPRO | SAXS  | AUC  | HYDROPRO             | SAXS  | AUC  |
| Radius of gyration (Å)                          | 14.20    | 14.43 |      | 23.70    | 23.7  |      | 20.60                | 20.33 |      |
| Volume (Å <sup>3</sup> )                        | 17000    | 9500  |      | 33800    | 27400 |      | 29100                | 19600 |      |
| Sedimentation coefficient (S)                   | 2.53     |       | 2.60 | 3.04     |       | 3.57 | 3.26                 |       | 3.61 |

|                                                 | c-Kit-8  |       |      | c-Kit-12 |       |      | c-Kit-12 DNaseI |       |      | k-Ras-8  |       |      |
|-------------------------------------------------|----------|-------|------|----------|-------|------|-----------------|-------|------|----------|-------|------|
| MW (Da)                                         | 12140    |       |      | 20340    |       |      | 14700           |       |      | 13750    |       |      |
| Calculated volume (Å <sup>3</sup> ) (eq. 2 & 3) | 17516    |       |      | 29347    |       |      | 21209           |       |      | 19839    |       |      |
| V <sub>s</sub> (from DAMMIN refine header)      | 11.06    |       |      | 45.28    |       |      | 19.10           |       |      | 30.34    |       |      |
| Calculated AER (eq. 4)                          | 1.38     |       |      | 2.21     |       |      | 1.66            |       |      | 1.93     |       |      |
| Adjusted AER                                    | 1.20     |       |      | 1.77     |       |      | 1.38            |       |      | 1.70     |       |      |
|                                                 | HYDROPRO | SAXS  | AUC  | HYDROPRO | SAXS  | AUC  | HYDROPRO        | SAXS  | AUC  | HYDROPRO | SAXS  | AUC  |
| Radius of gyration (Å)                          | 15.00    | 14.95 |      | 26.50    | 25.1  |      | 16.40           | 16.55 |      | 17.40    | 16.98 |      |
| Volume (Å <sup>3</sup> )                        | 18800    | 11400 |      | 30100    | 23900 |      | 20800           | 12700 |      | 18500    | 14600 |      |
| Sedimentation coefficient (S)                   | 2.46     |       | 2.70 | 2.96     |       | 3.33 | 2.82            |       | 2.85 | 2.56     |       | 2.83 |

Table S5. Tabulated hydrodynamic results from SAXS-derived *ab initio* bead models.

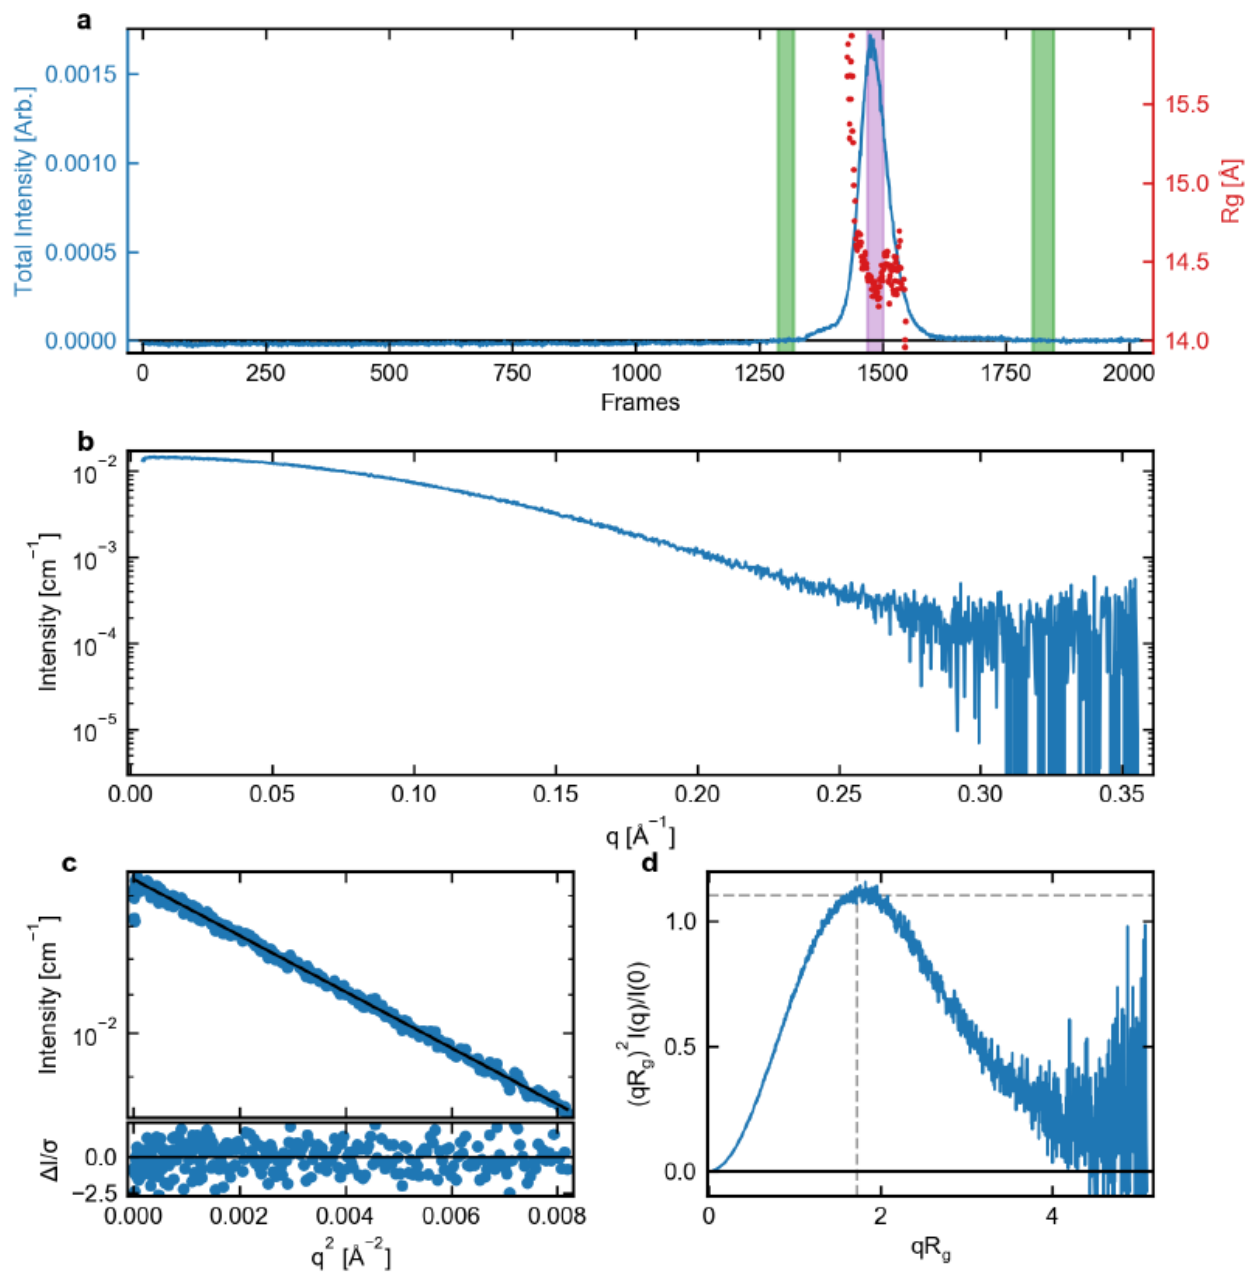

S1. SAXS data summary for c-Myc-8. a) Series intensity (blue, left axis) vs. frame, and, if available, Rg vs. frame (red, right axis). Green shaded regions are buffer regions, purple shaded regions are sample regions. b) Scattering profile(s) on a log-lin scale. c) Guinier fit(s) (top) and fit residuals (bottom). d) Normalized Kratky plot. Dashed lines show where a globular system would peak. Figure created in BioXTAS RAW v2.1.1.

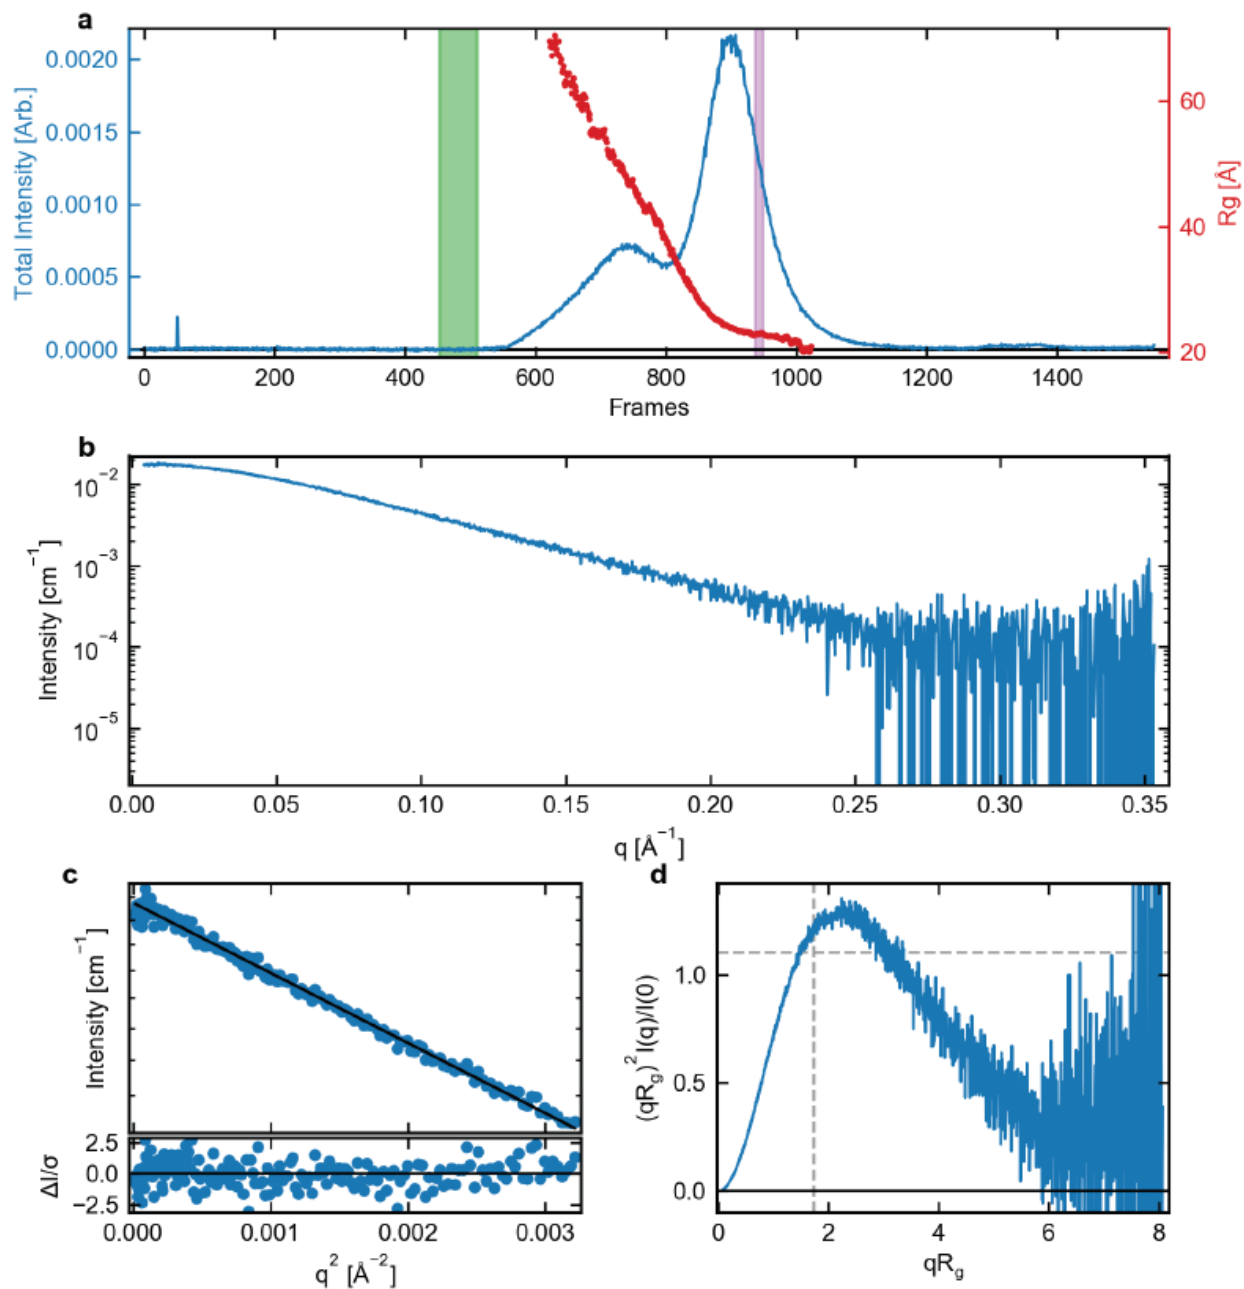

S2. SAXS data summary for c-Myc-12. a) Series intensity (blue, left axis) vs. frame, and, if available,  $R_g$  vs. frame (red, right axis). Green shaded regions are buffer regions, purple shaded regions are sample regions. b) Scattering profile(s) on a log-lin scale. c) Guinier fit(s) (top) and fit residuals (bottom). d) Normalized Kratky plot. Dashed lines show where a globular system would peak. Figure created in BioXTAS RAW v2.1.1.



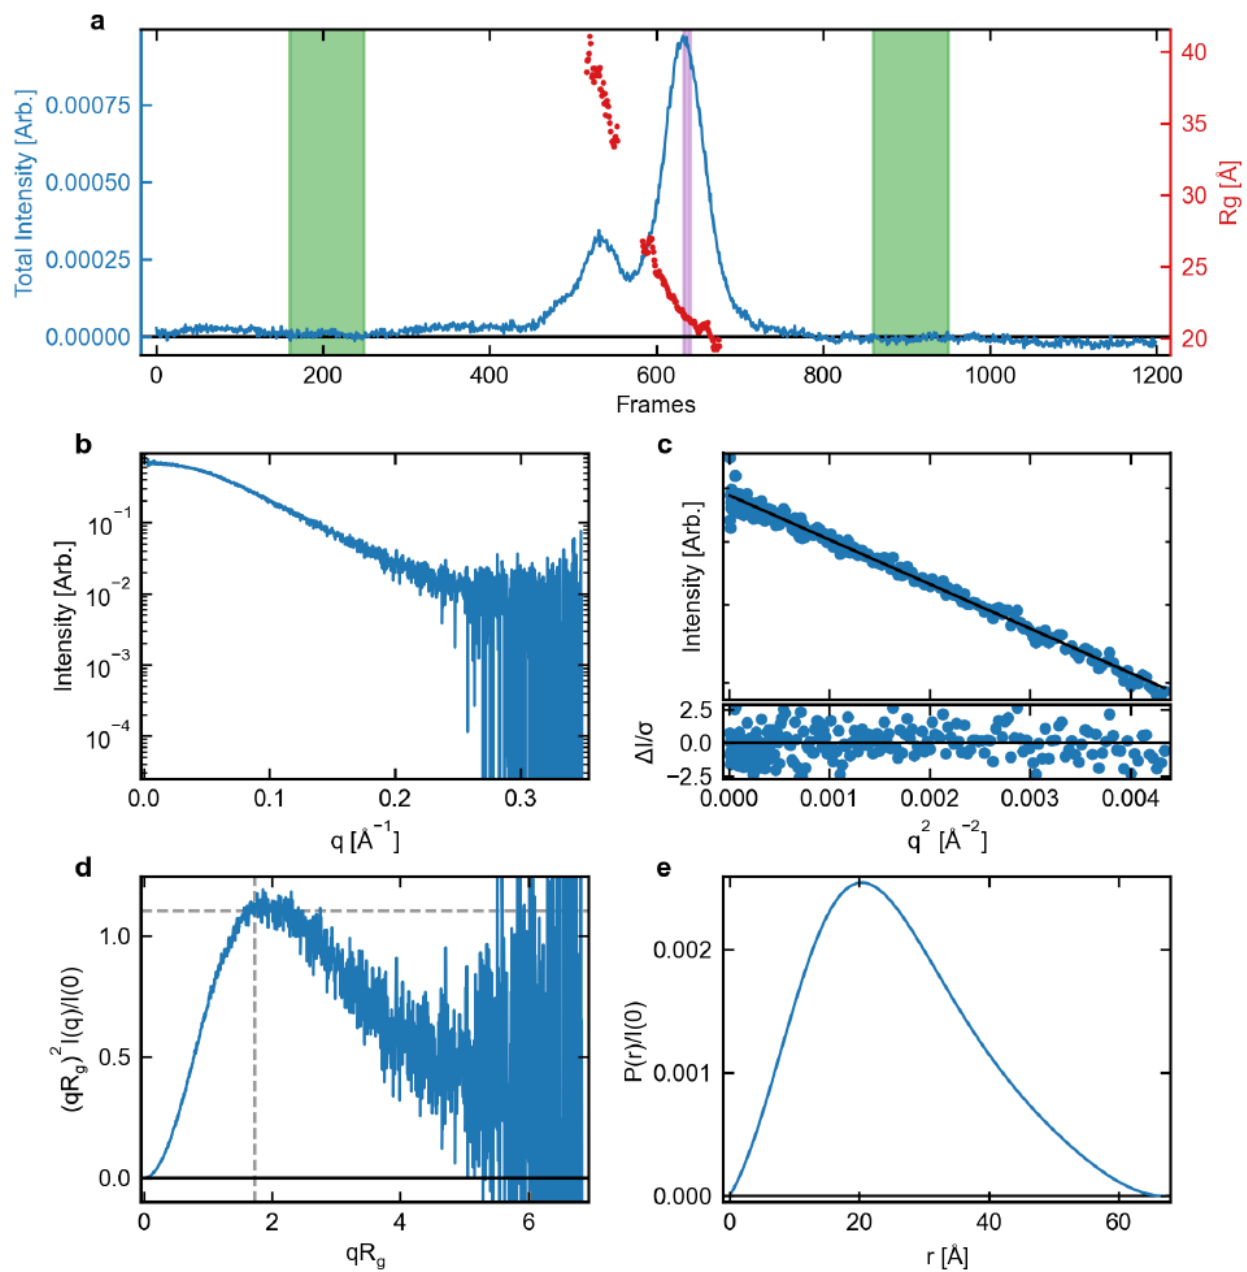

S3. SAXS data summary for c-Myc-12 Post-DNaseI. a) Series intensity (blue, left axis) vs. frame, and, if available, Rg vs. frame (red, right axis). Green shaded regions are buffer regions, purple shaded regions are sample regions. b) Scattering profile(s) on a log-lin scale. c) Guinier fit(s) (top) and fit residuals (bottom). d) Normalized Kratky plot. Dashed lines show where a globular system would peak. e) P(r) function(s), normalized by I(0). Figure created in BioXTAS RAW v2.1.1.

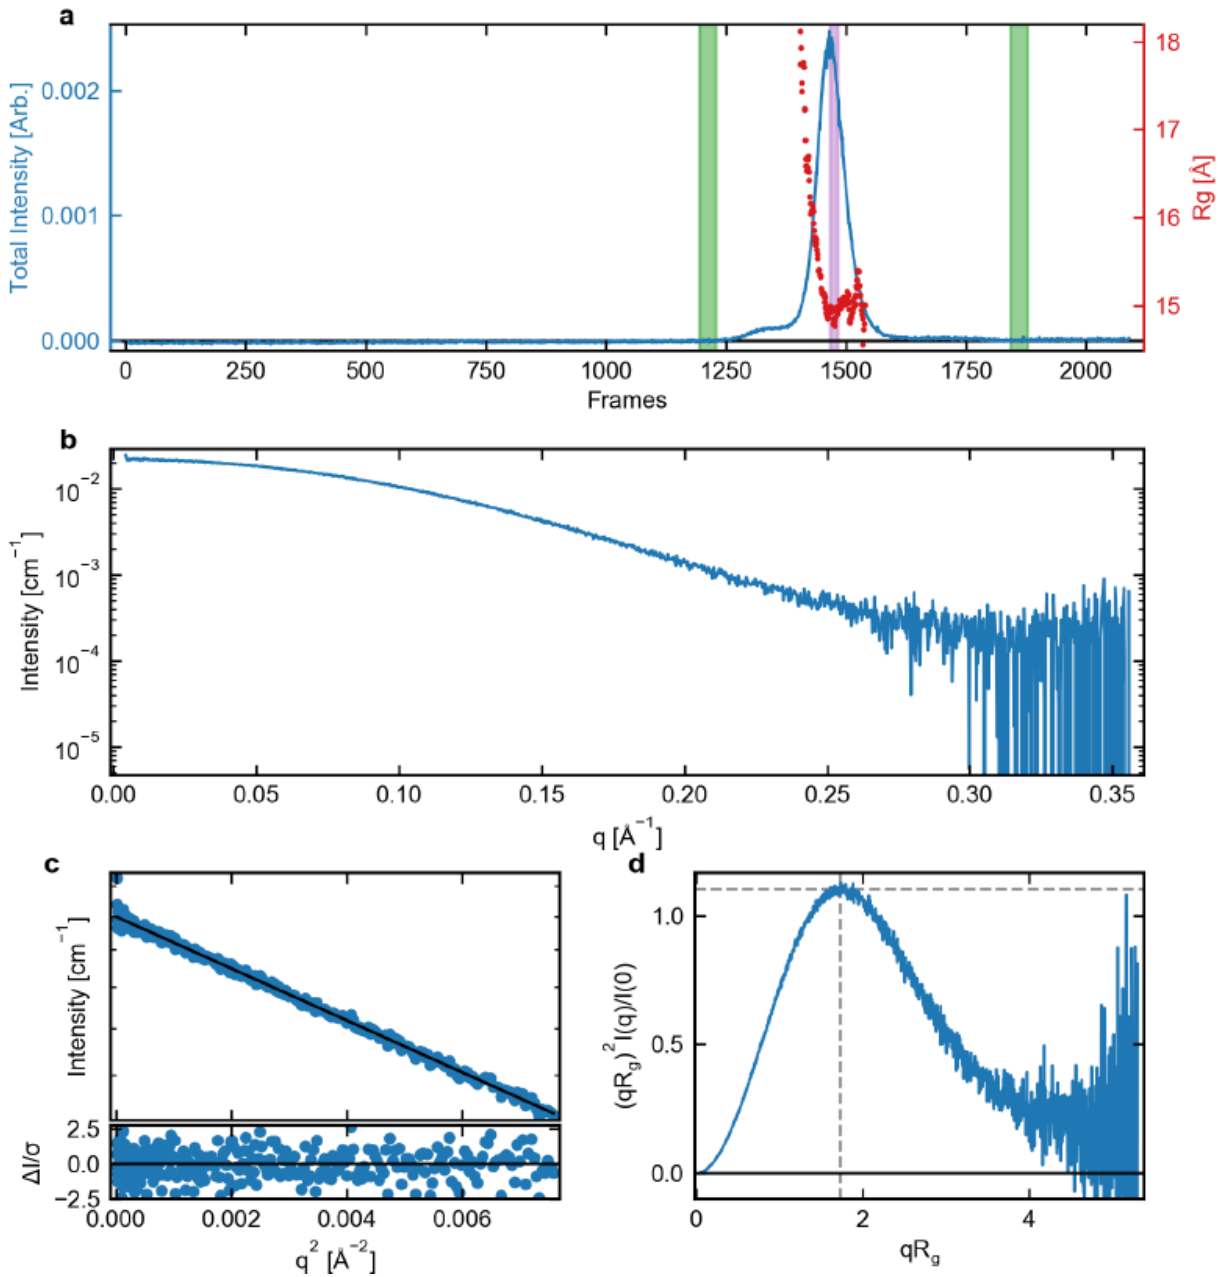

S4. SAXS data summary for c-Kit-8. a) Series intensity (blue, left axis) vs. frame, and, if available,  $R_g$  vs. frame (red, right axis). Green shaded regions are buffer regions, purple shaded regions are sample regions. b) Scattering profile(s) on a log-lin scale. c) Guinier fit(s) (top) and fit residuals (bottom). d) Normalized Kratky plot. Dashed lines show where a globular system would peak. Figure created in BioXTAS RAW v2.1.1.

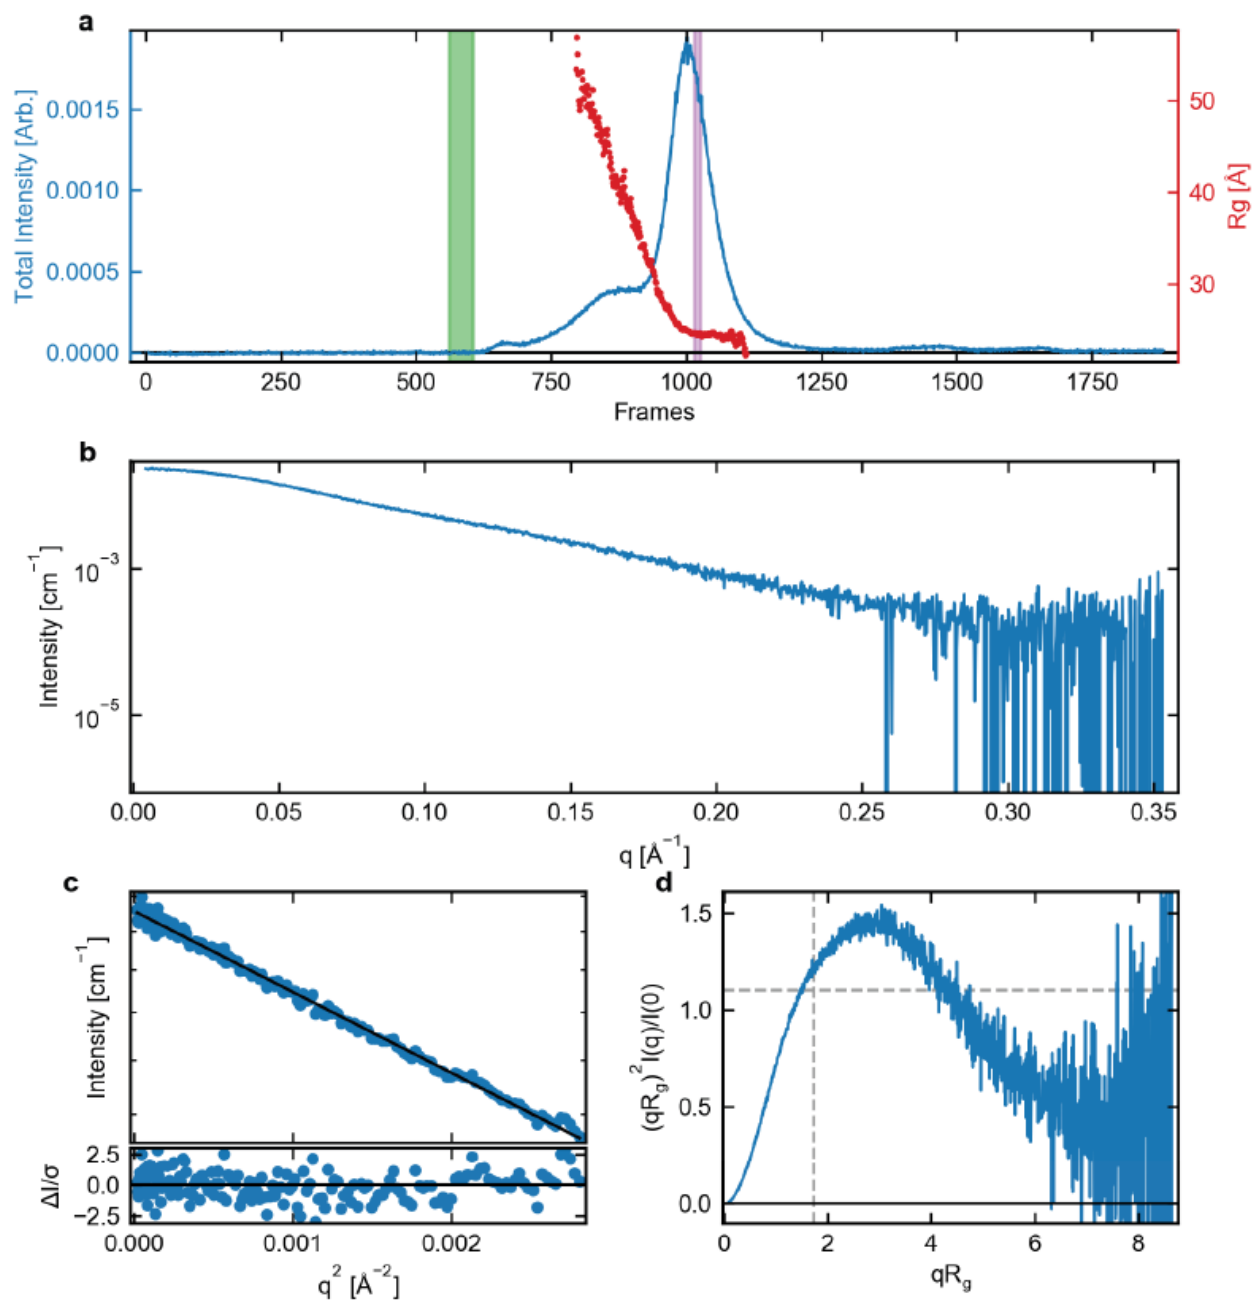

S5. SAXS data summary for c-Kit-12. a) Series intensity (blue, left axis) vs. frame, and, if available,  $R_g$  vs. frame (red, right axis). Green shaded regions are buffer regions, purple shaded regions are sample regions. b) Scattering profile(s) on a log-lin scale. c) Guinier fit(s) (top) and fit residuals (bottom). d) Normalized Kratky plot. Dashed lines show where a globular system would peak. Figure created in BioXTAS RAW v2.1.1.

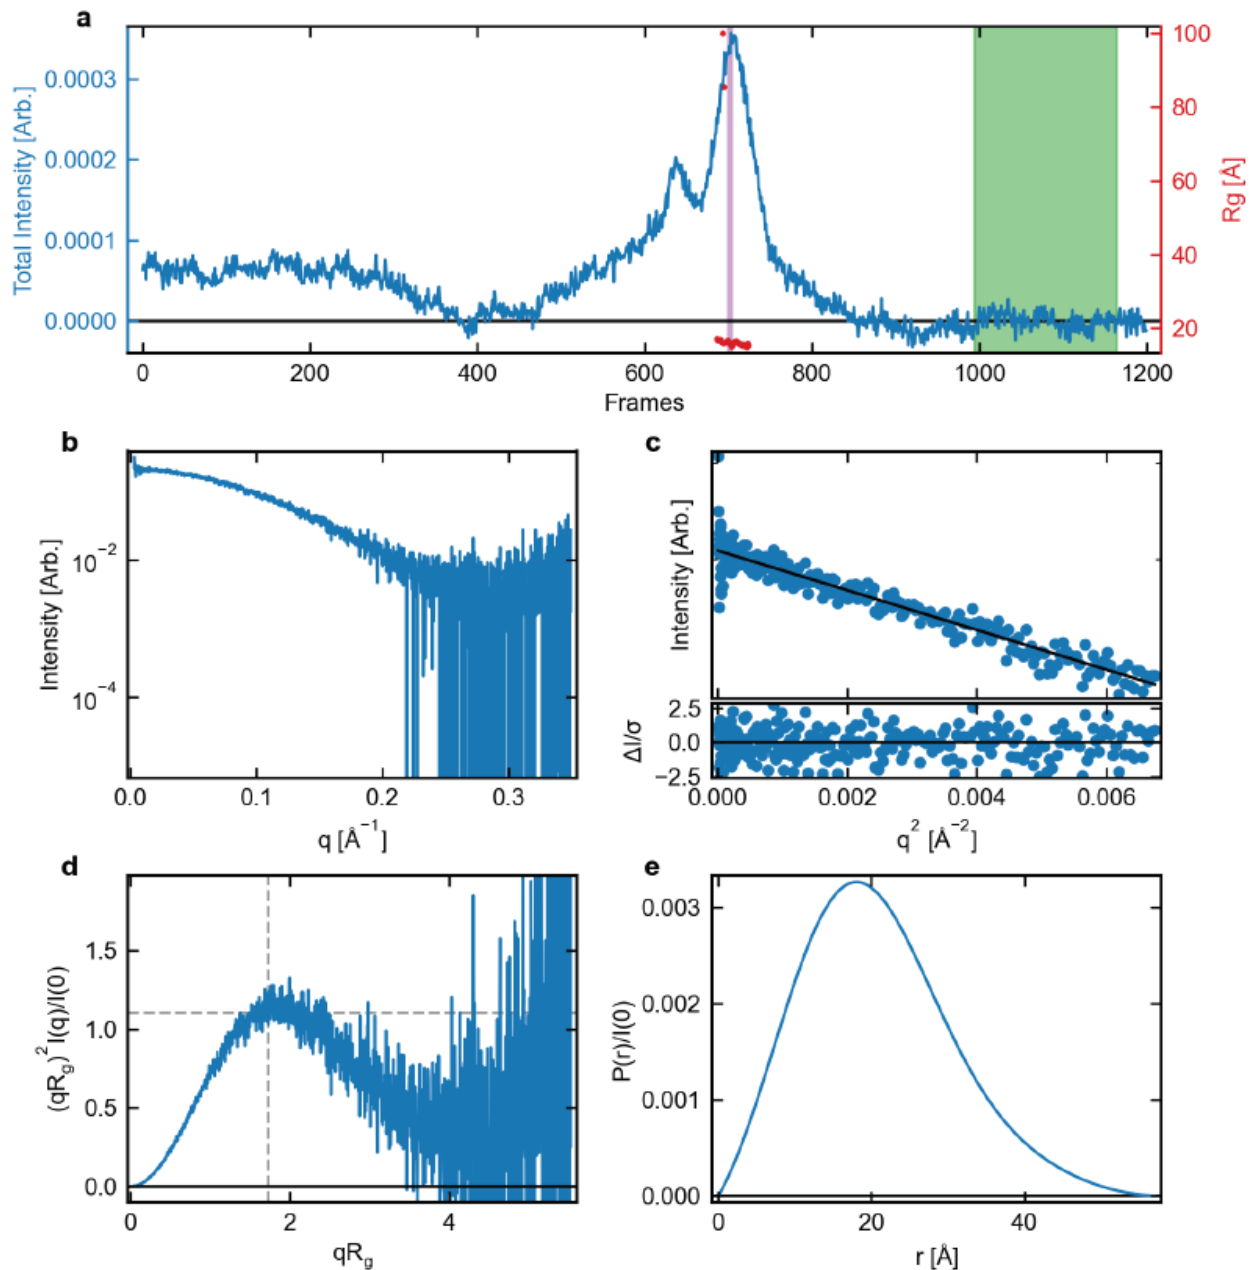

S6. SAXS data summary for c-Kit-12 Post-DNaseI. a) Series intensity (blue, left axis) vs. frame, and, if available,  $R_g$  vs. frame (red, right axis). Green shaded regions are buffer regions, purple shaded regions are sample regions. b) Scattering profile(s) on a log-lin scale. c) Guinier fit(s) (top) and fit residuals (bottom). d) Normalized Kratky plot. e) Normalized Pr distribution. Dashed lines show where a globular system would peak. Figure created in BioXTAS RAW v2.1.1.

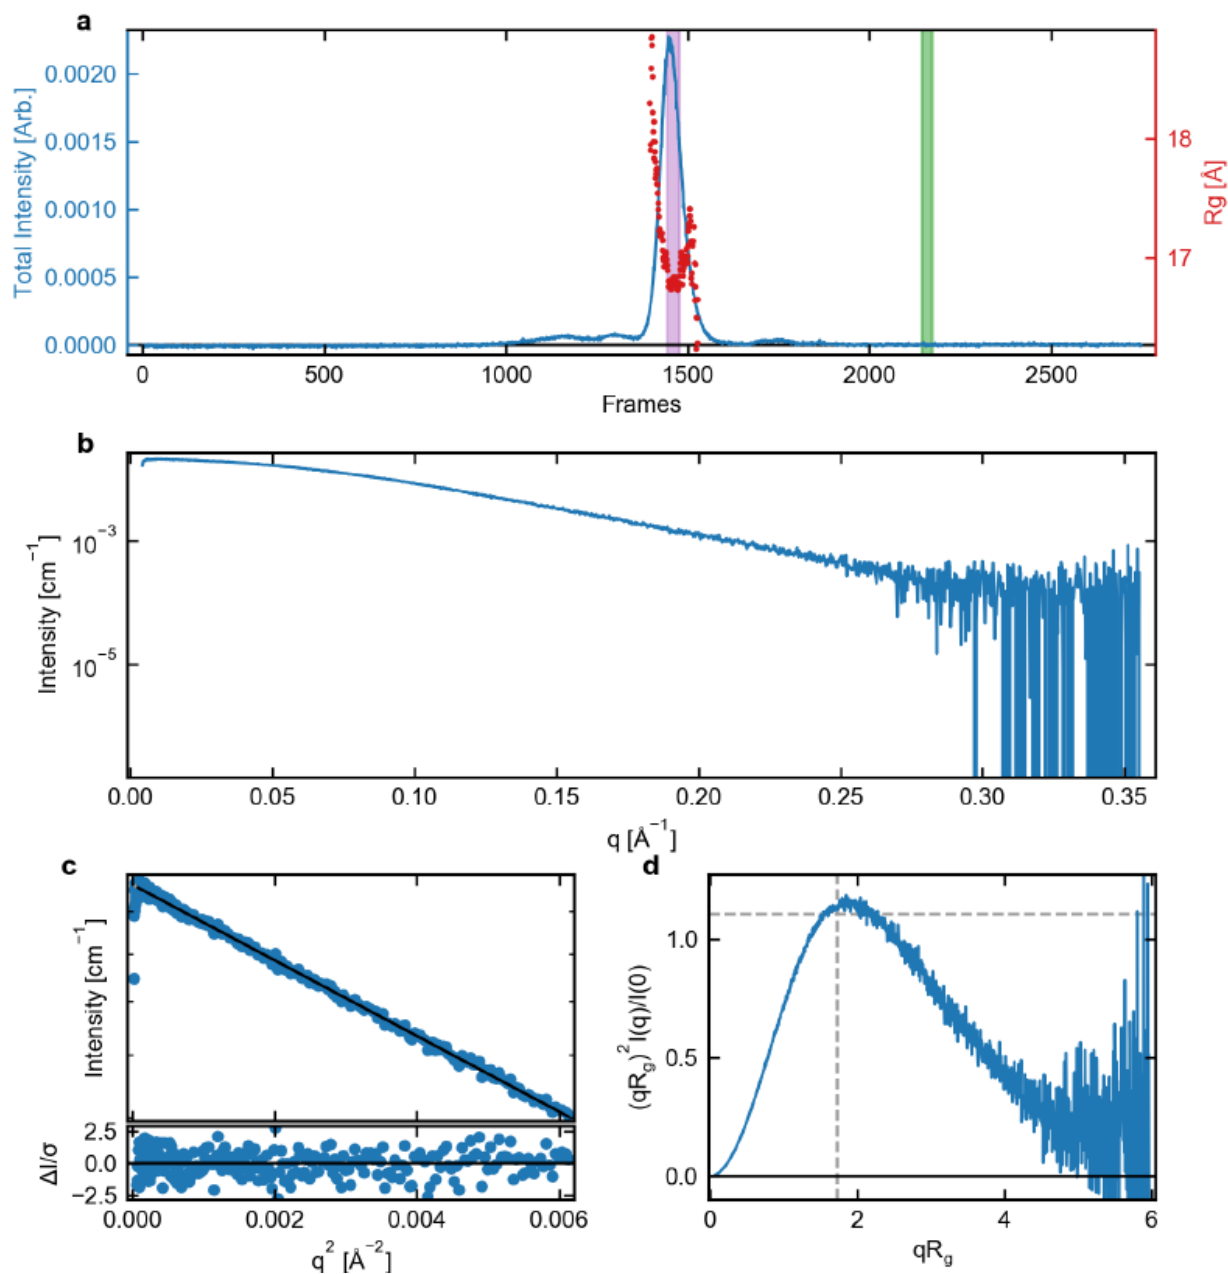

S7. SAXS data summary for k-Ras-8 Post-DNasel. a) Series intensity (blue, left axis) vs. frame, and, if available,  $R_g$  vs. frame (red, right axis). Green shaded regions are buffer regions, purple shaded regions are sample regions. b) Scattering profile(s) on a log-lin scale. c) Guinier fit(s) (top) and fit residuals (bottom). d) Normalized Kratky plot. Dashed lines show where a globular system would peak. Figure created in BioXTAS RAW v2.1.1.

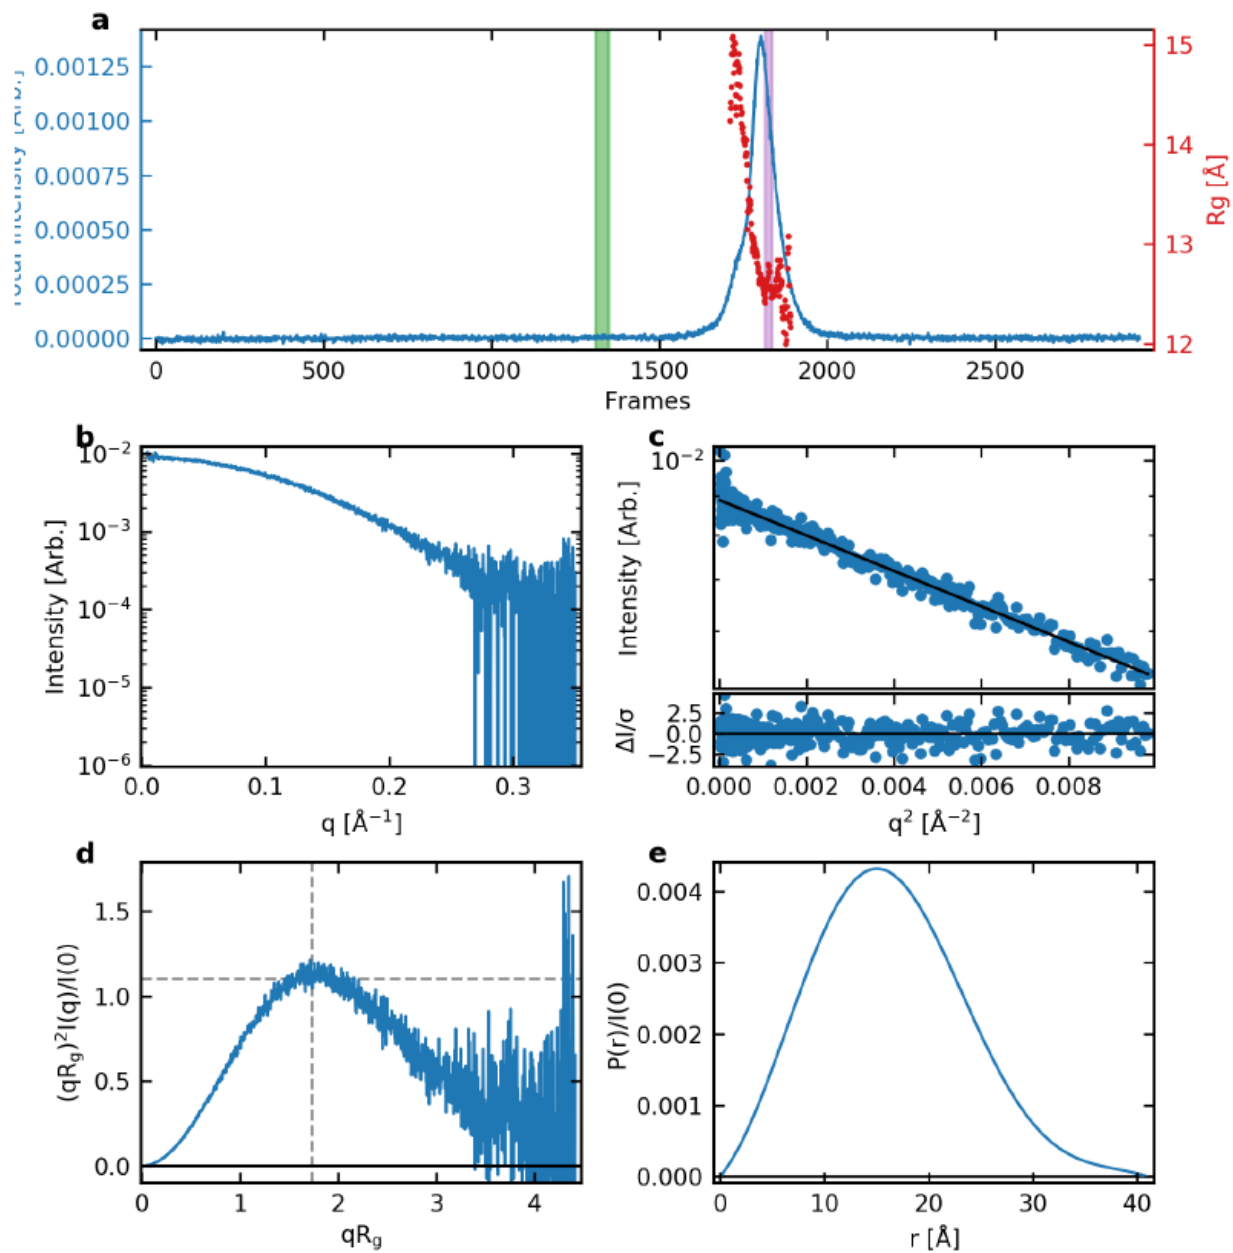

S8. SAXS data summary for 1XAV. a) Series intensity (blue, left axis) vs. frame, and, if available,  $R_g$  vs. frame (red, right axis). Green shaded regions are buffer regions, purple shaded regions are sample regions. b) Scattering profile(s) on a log-linear scale. c) Guinier fit(s) (top) and fit residuals (bottom). d) Normalized Kratky plot. Dashed lines show where a globular system would peak. e)  $P(r)$  function(s), normalized by  $I(0)$ . Figure created in BioXTAS RAW v2.1.1.

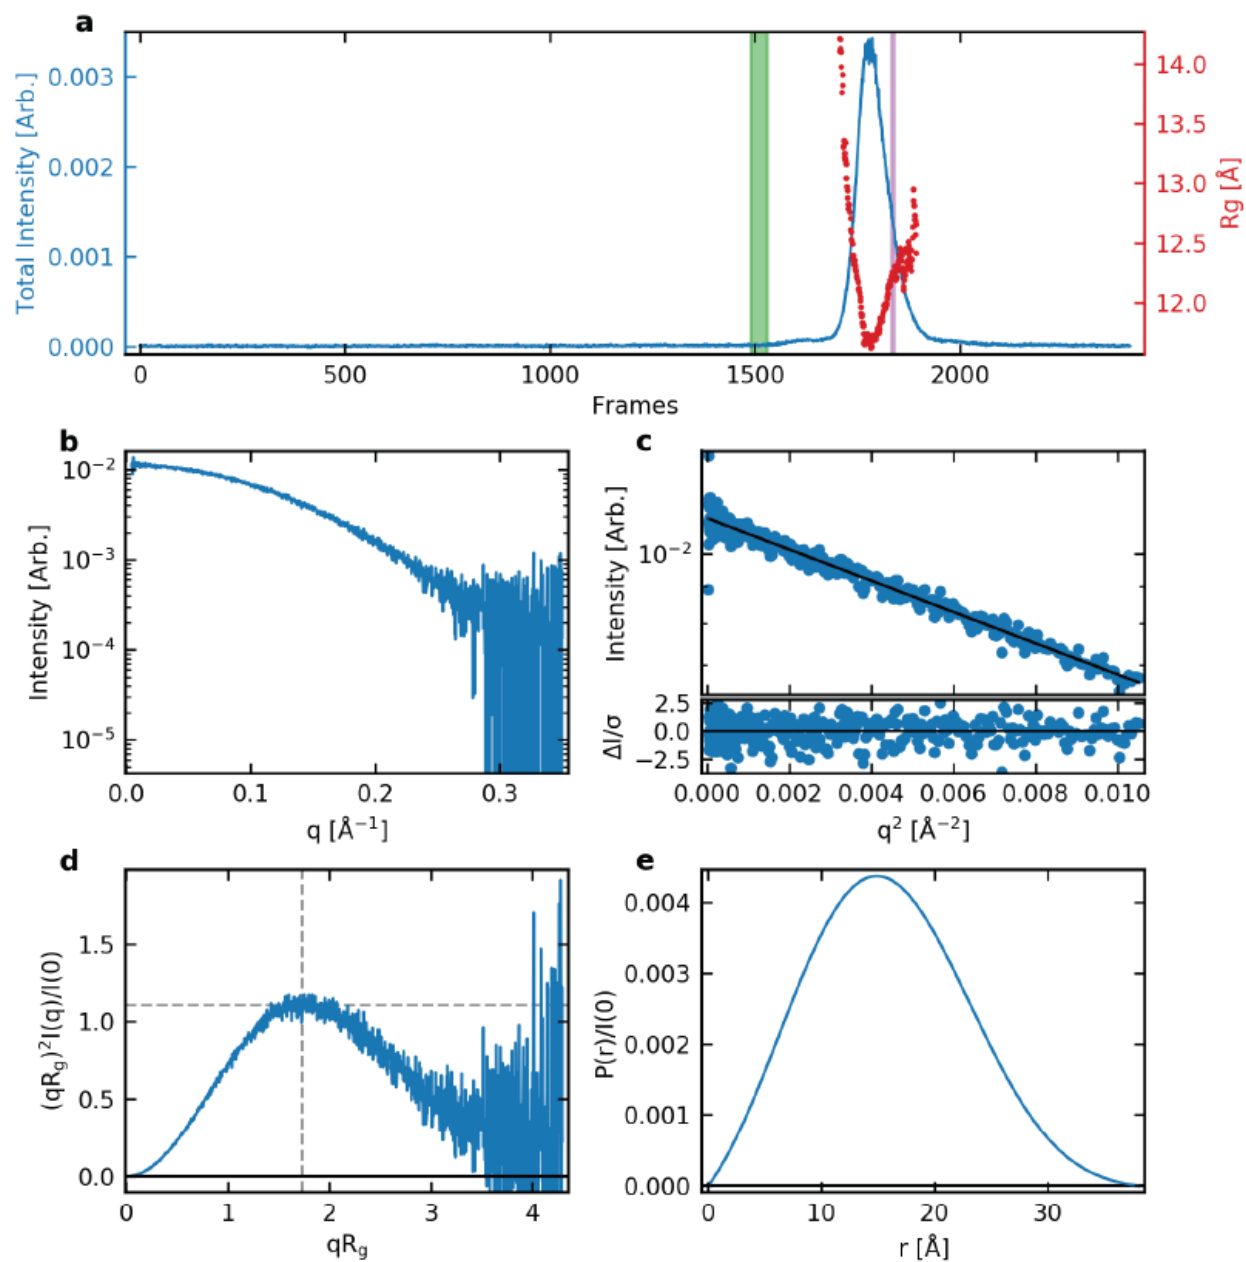

S9. SAXS data summary for 2GKU. a) Series intensity (blue, left axis) vs. frame, and, if available, Rg vs. frame (red, right axis). Green shaded regions are buffer regions, purple shaded regions are sample regions. b) Scattering profile(s) on a log-lin scale. c) Guinier fit(s) (top) and fit residuals (bottom). d) Normalized Kratky plot. Dashed lines show where a globular system would peak. e) P(r) function(s), normalized by I(0). Figure created in BioXTAS RAW v2.1.1.

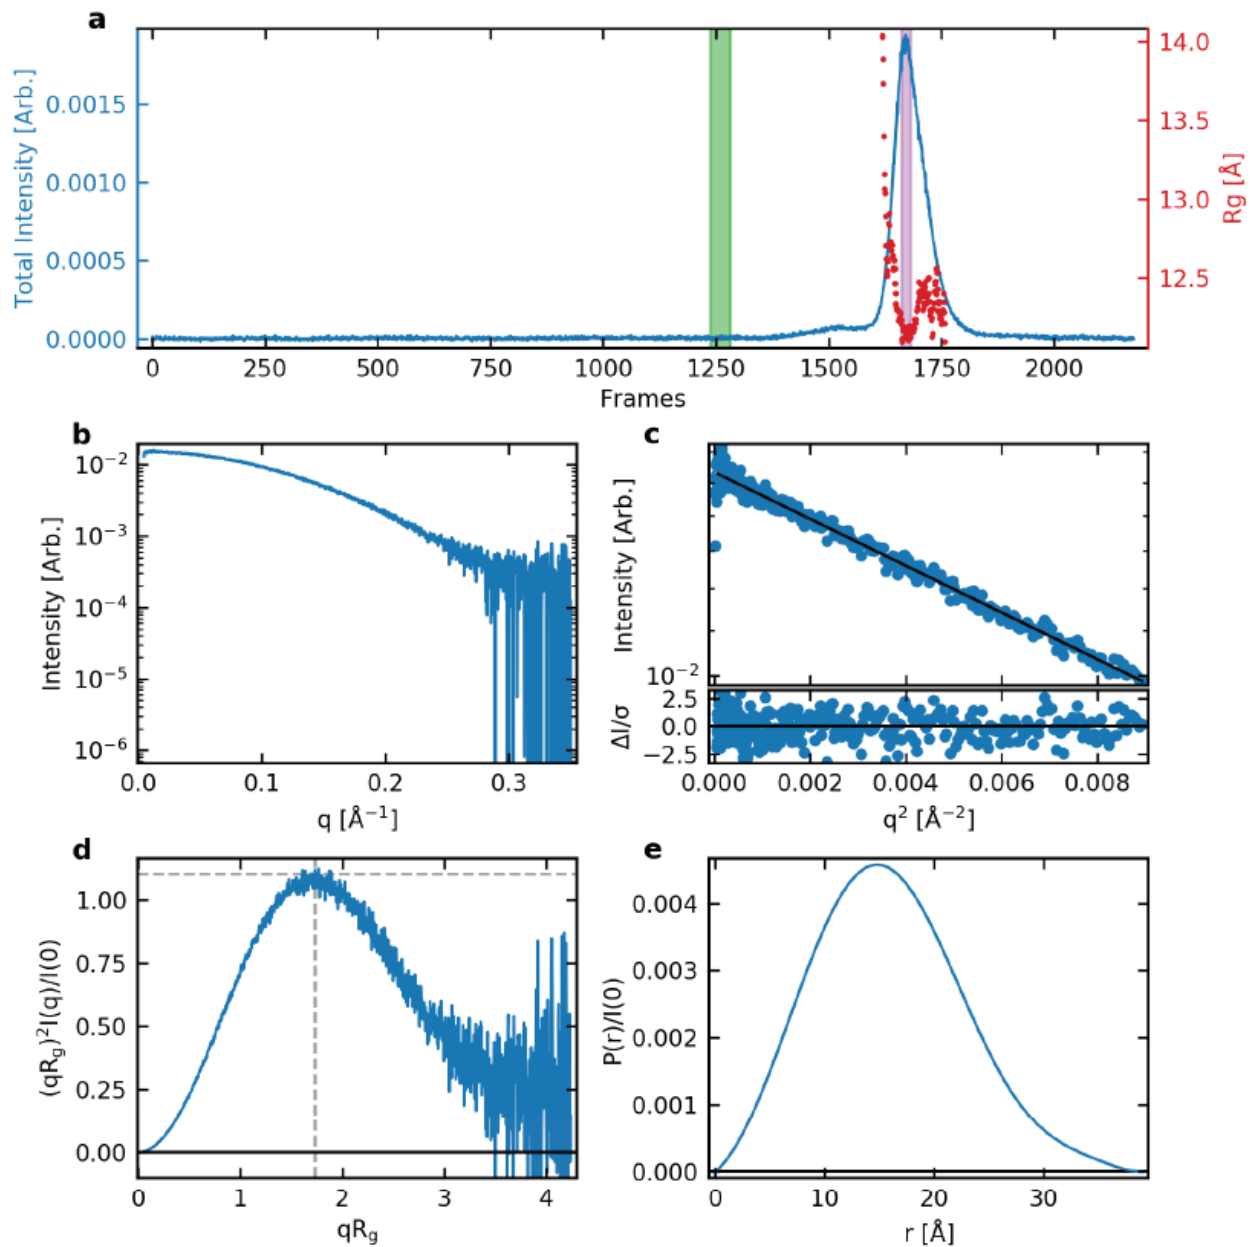

S10. SAXS data summary for 2JSL. a) Series intensity (blue, left axis) vs. frame, and, if available, Rg vs. frame (red, right axis). Green shaded regions are buffer regions, purple shaded regions are sample regions. b) Scattering profile(s) on a log-lin scale. c) Guinier fit(s) (top) and fit residuals (bottom). d) Normalized Kratky plot. Dashed lines show where a globular system would peak. e) P(r) function(s), normalized by I(0). Figure created in BioXTAS RAW v2.1.1.



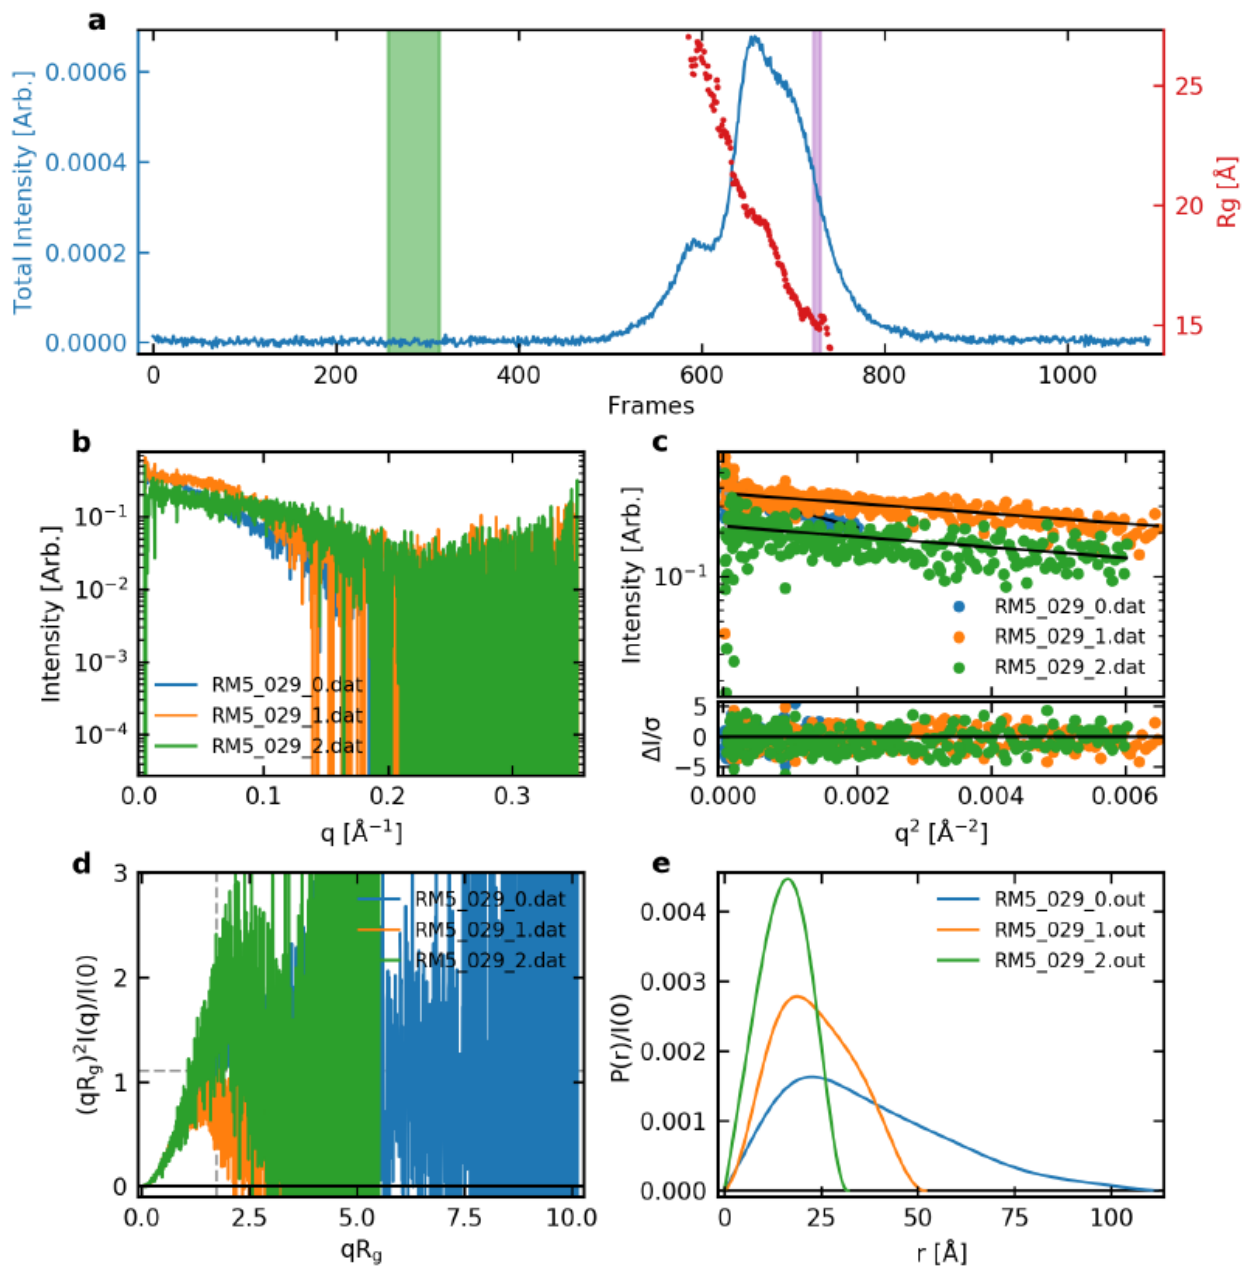

S11. SAXS data summary for 2KQG. a) Series intensity (blue, left axis) vs. frame, and, if available,  $R_g$  vs. frame (red, right axis). Green shaded regions are buffer regions, purple shaded regions are sample regions. b) Scattering profile(s) on a log-lin scale. c) Guinier fit(s) (top) and fit residuals (bottom). d) Normalized Kratky plot. Dashed lines show where a globular system would peak. e)  $P(r)$  function(s), normalized by  $I(0)$ . Green (029\_2), orange (029\_1), and blue (029\_0) species are the result of deconvolution using evolving factor analysis(1). The monomeric species, as determined by approximate molecular weight ( $V_c$ ), is shown in green. Figure created in BioXTAS RAW v2.1.1.

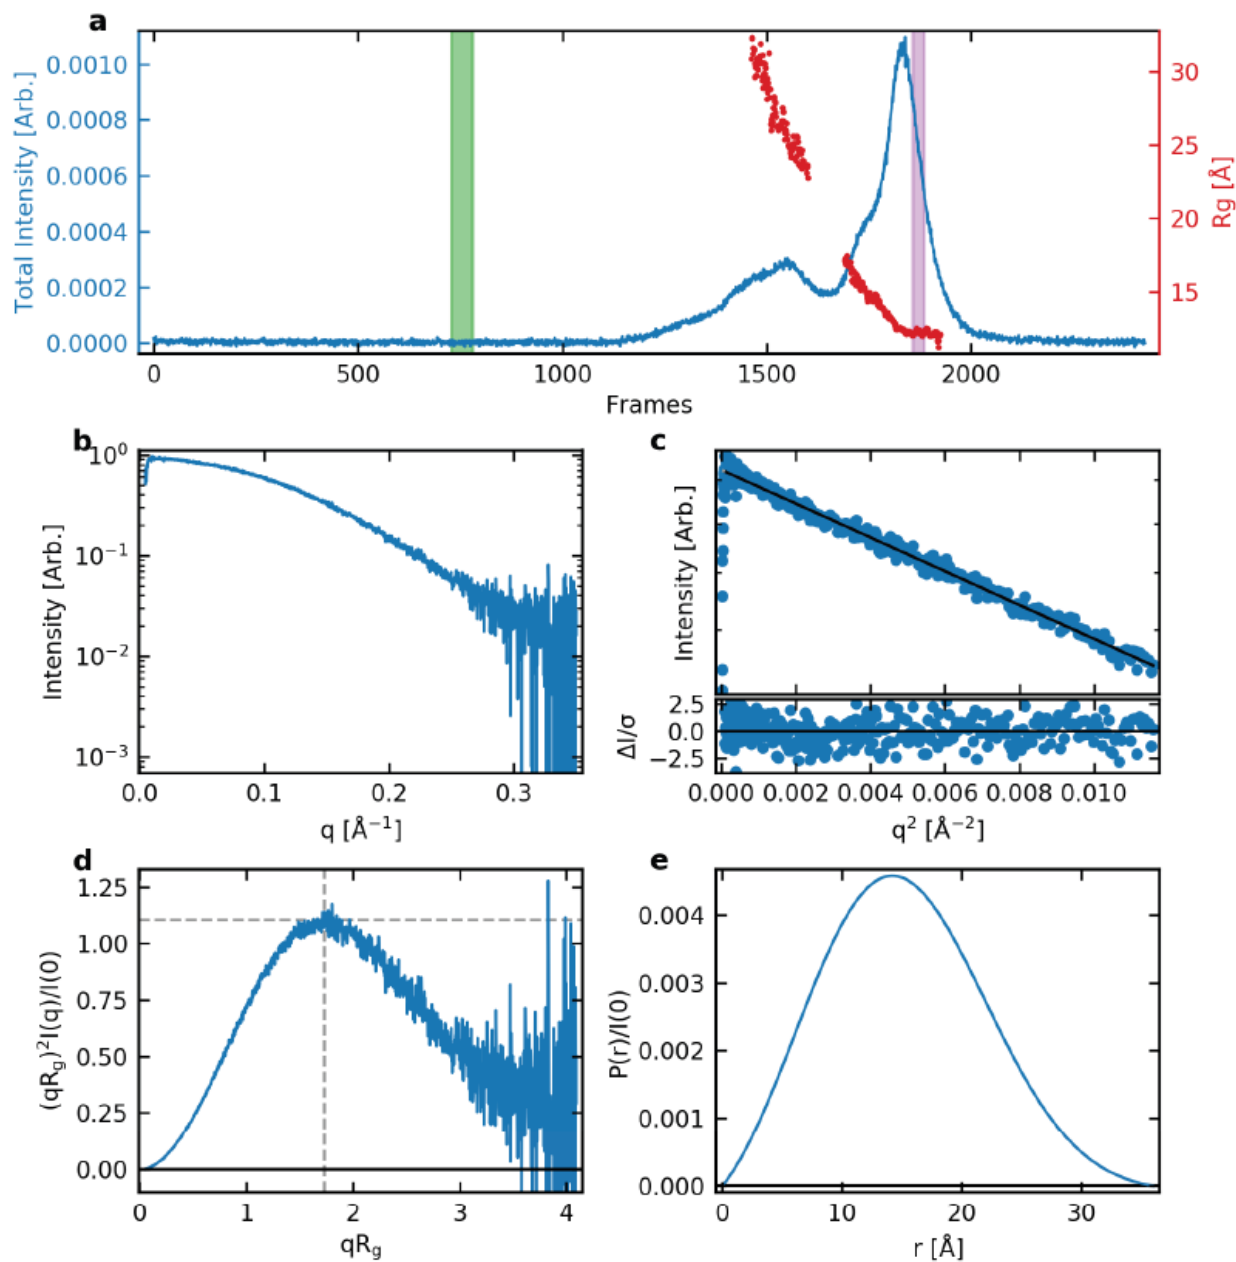

S12. SAXS data summary for 2KZD. a) Series intensity (blue, left axis) vs. frame, and, if available, Rg vs. frame (red, right axis). Green shaded regions are buffer regions, purple shaded regions are sample regions. b) Scattering profile(s) on a log-lin scale. c) Guinier fit(s) (top) and fit residuals (bottom). d) Normalized Kratky plot. Dashed lines show where a globular system would peak. e) P(r) function(s), normalized by I(0). Figure created in BioXTAS RAW v2.1.1.

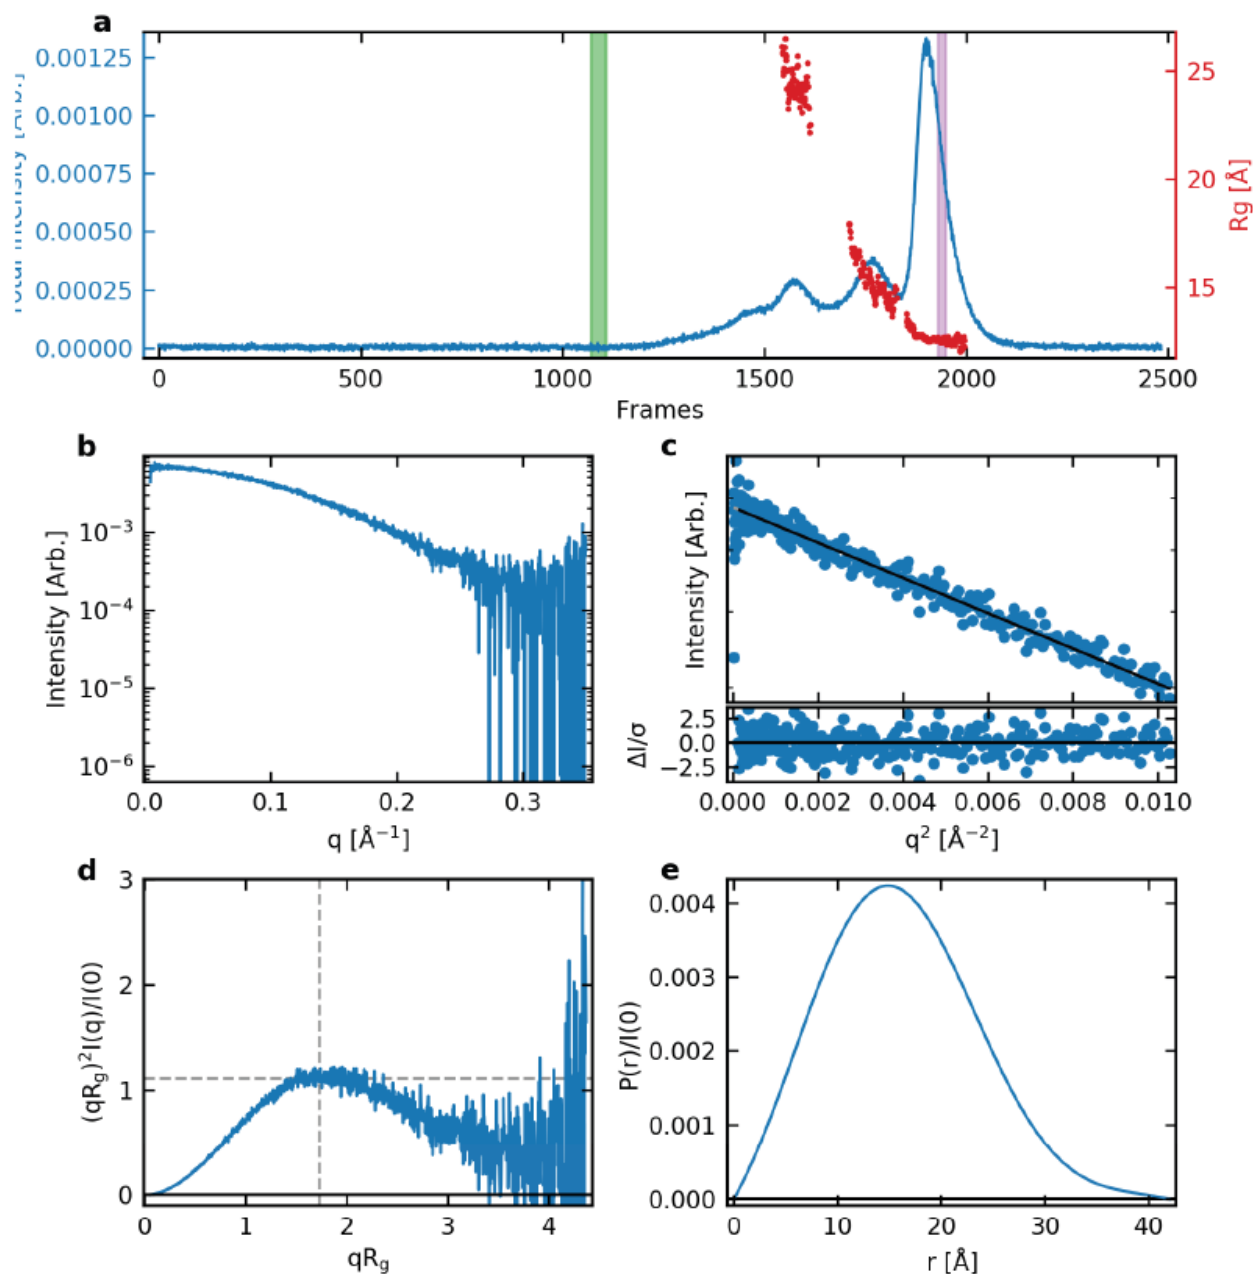

S13. SAXS data summary for 2KZE. a) Series intensity (blue, left axis) vs. frame, and, if available,  $R_g$  vs. frame (red, right axis). Green shaded regions are buffer regions, purple shaded regions are sample regions. b) Scattering profile(s) on a log-linear scale. c) Guinier fit(s) (top) and fit residuals (bottom). d) Normalized Kratky plot. Dashed lines show where a globular system would peak. e)  $P(r)$  function(s), normalized by  $I(0)$ . Figure created in BioXTAS RAW v2.1.1.

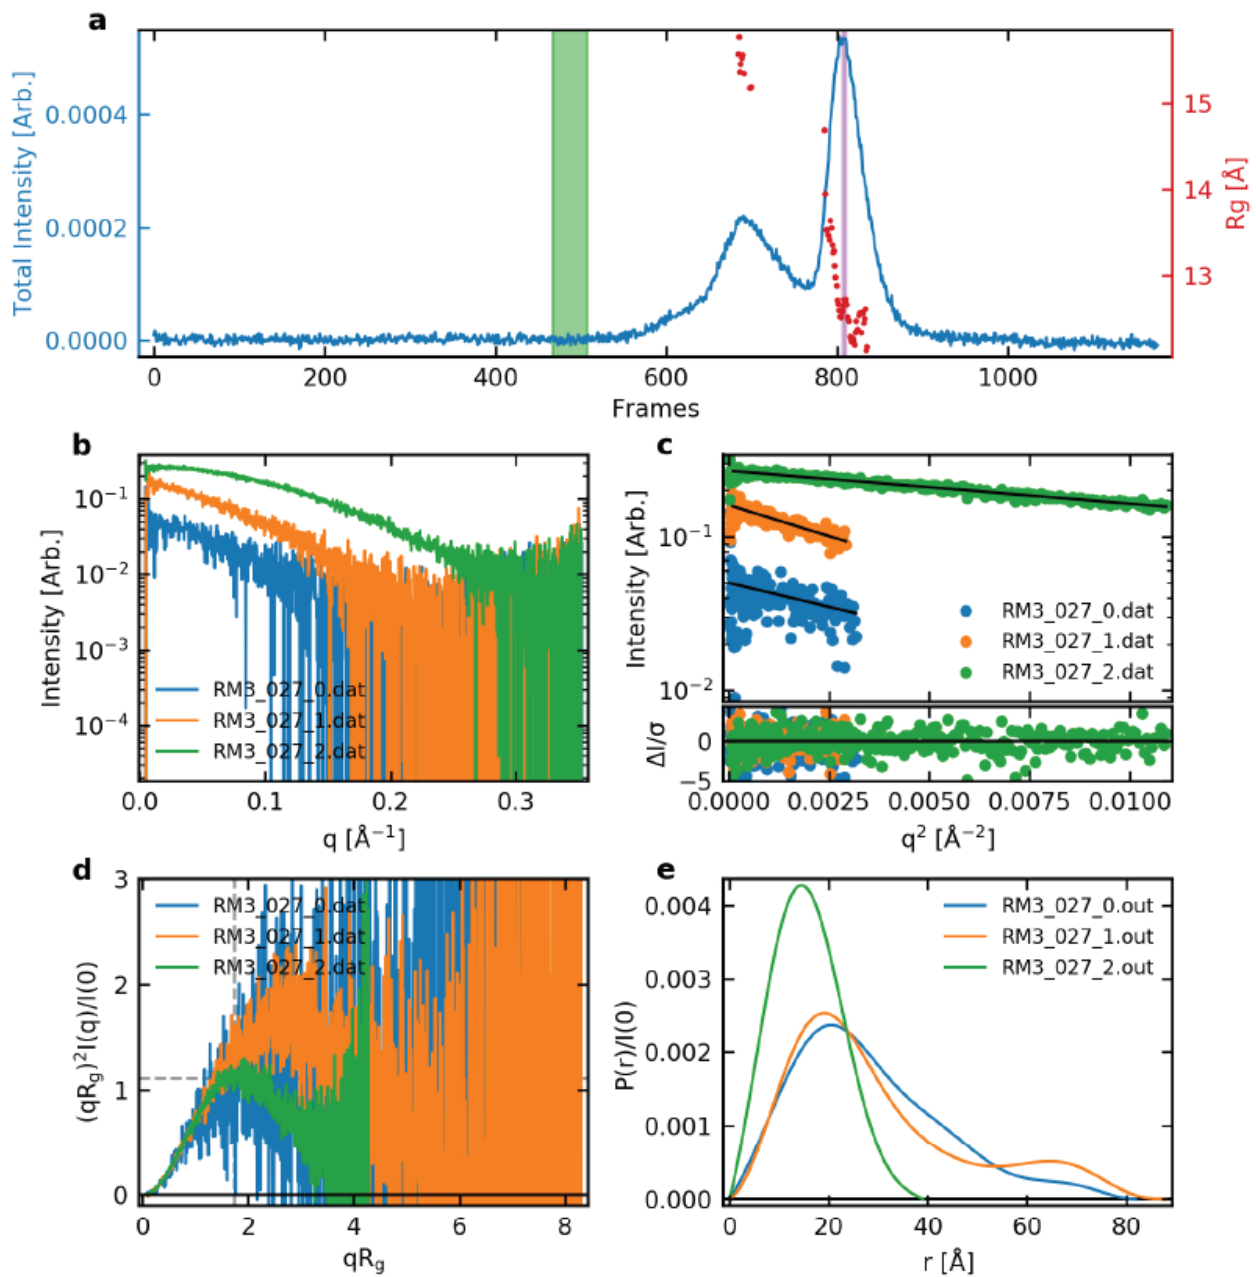

S14. SAXS data summary for 2LBY. a) Series intensity (blue, left axis) vs. frame, and, if available,  $R_g$  vs. frame (red, right axis). Green shaded regions are buffer regions, purple shaded regions are sample regions. b) Scattering profile(s) on a log-lin scale. c) Guinier fit(s) (top) and fit residuals (bottom). d) Normalized Kratky plot. Dashed lines show where a globular system would peak. e)  $P(r)$  function(s), normalized by  $I(0)$ . Green (027\_2), orange (027\_1), and blue (027\_0) species are the result of deconvolution using evolving factor analysis(1). The monomeric species, as determined by approximate molecular weight ( $V_c$ ), is shown in green. Figure created in BioXTAS RAW v2.1.1.

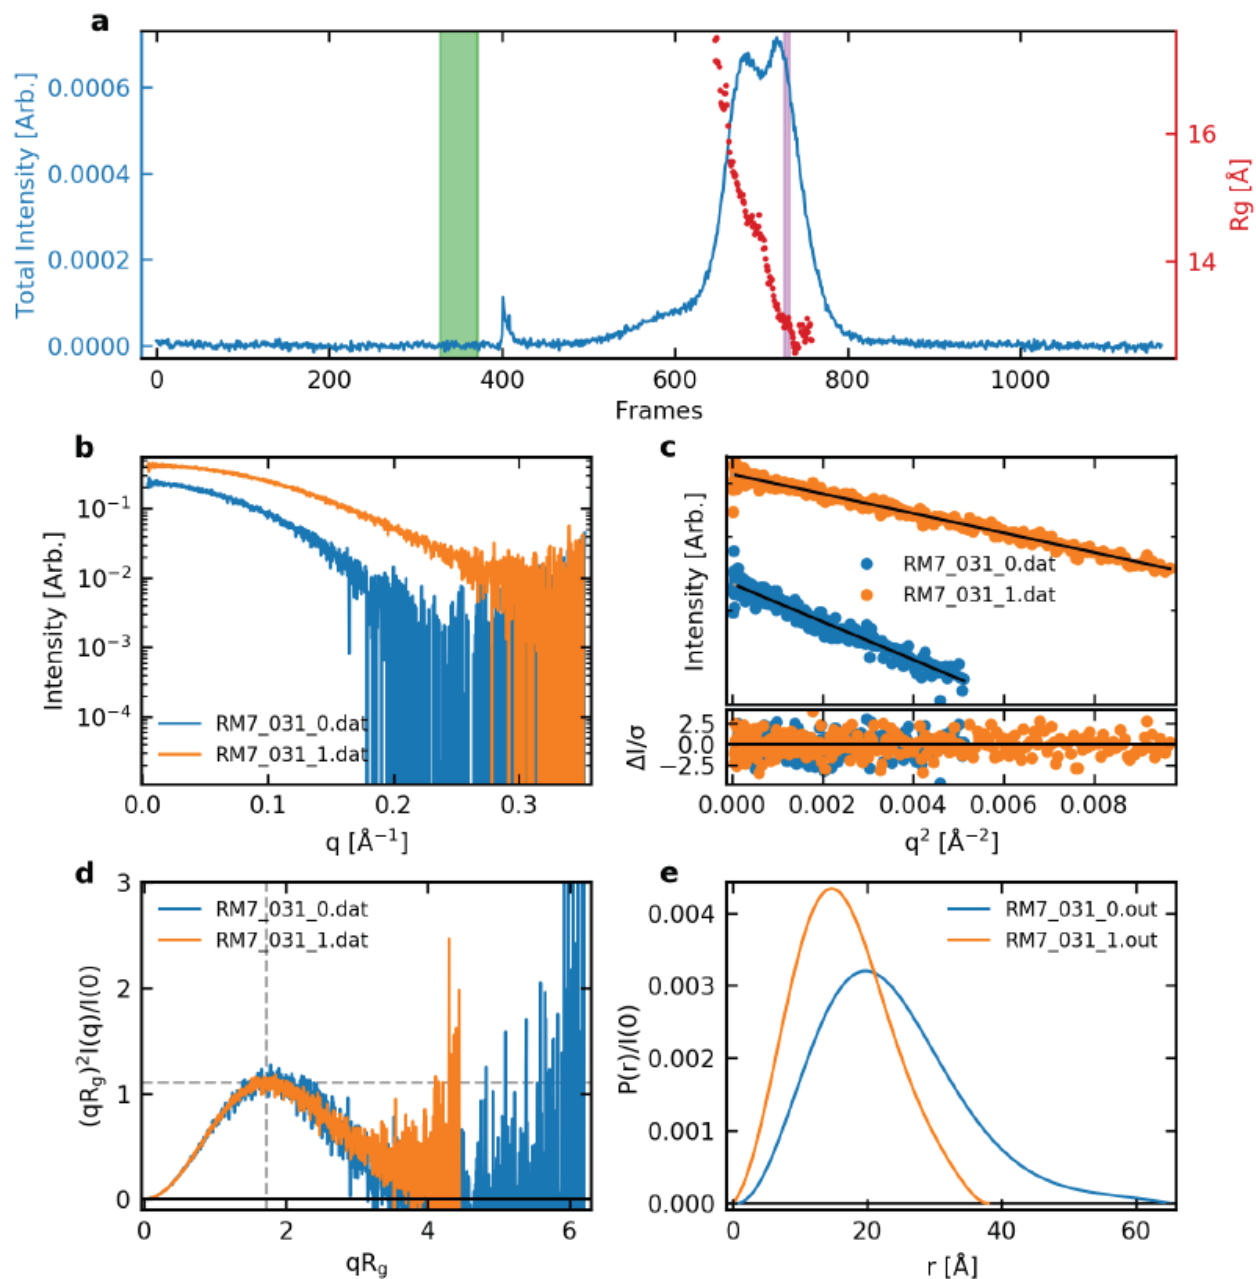

S15. SAXS data summary for 2M27. a) Series intensity (blue, left axis) vs. frame, and, if available, Rg vs. frame (red, right axis). Green shaded regions are buffer regions, purple shaded regions are sample regions. b) Scattering profile(s) on a log-lin scale. c) Guinier fit(s) (top) and fit residuals (bottom). d) Normalized Kratky plot. Dashed lines show where a globular system would peak. e) P(r) function(s), normalized by I(0). Orange (031\_1), and blue (031\_0) species are the result of deconvolution using evolving factor analysis(1). The monomeric species, as determined by approximate molecular weight (Vc), is shown in orange. Figure created in BioXTAS RAW v2.1.1.

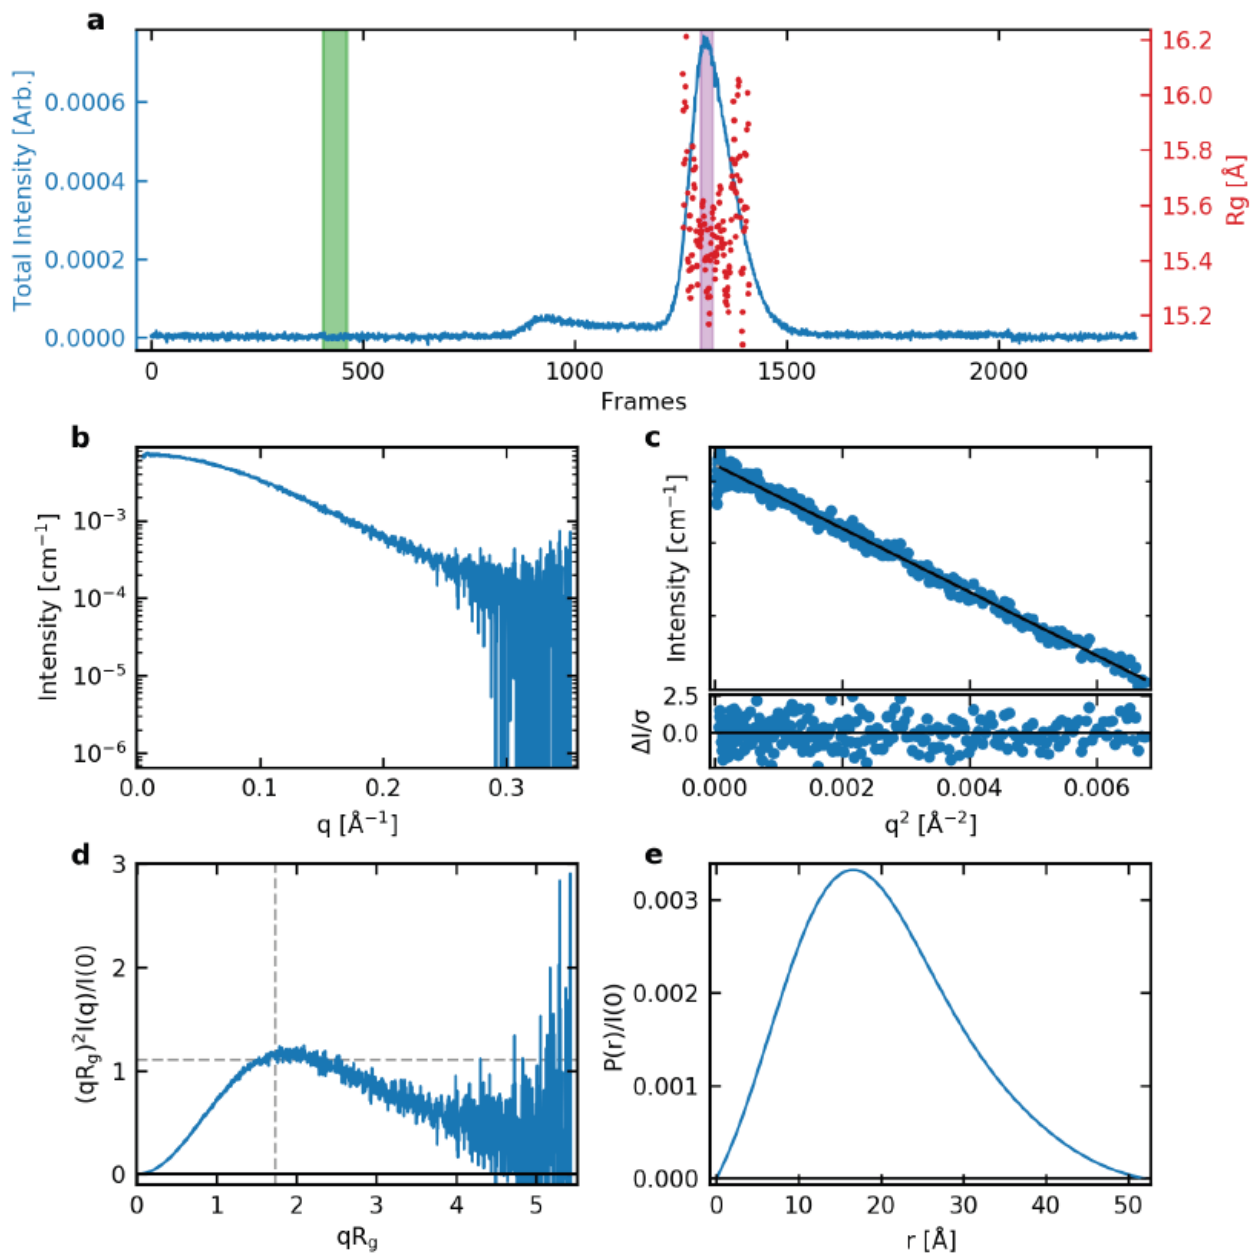

S16. SAXS data summary for 5CMX. a) Series intensity (blue, left axis) vs. frame, and, if available,  $R_g$  vs. frame (red, right axis). Green shaded regions are buffer regions, purple shaded regions are sample regions. b) Scattering profile(s) on a log-lin scale. c) Guinier fit(s) (top) and fit residuals (bottom). d) Normalized Kratky plot. Dashed lines show where a globular system would peak. e)  $P(r)$  function(s), normalized by  $I(0)$ . Figure created in BioXTAS RAW v2.1.1.

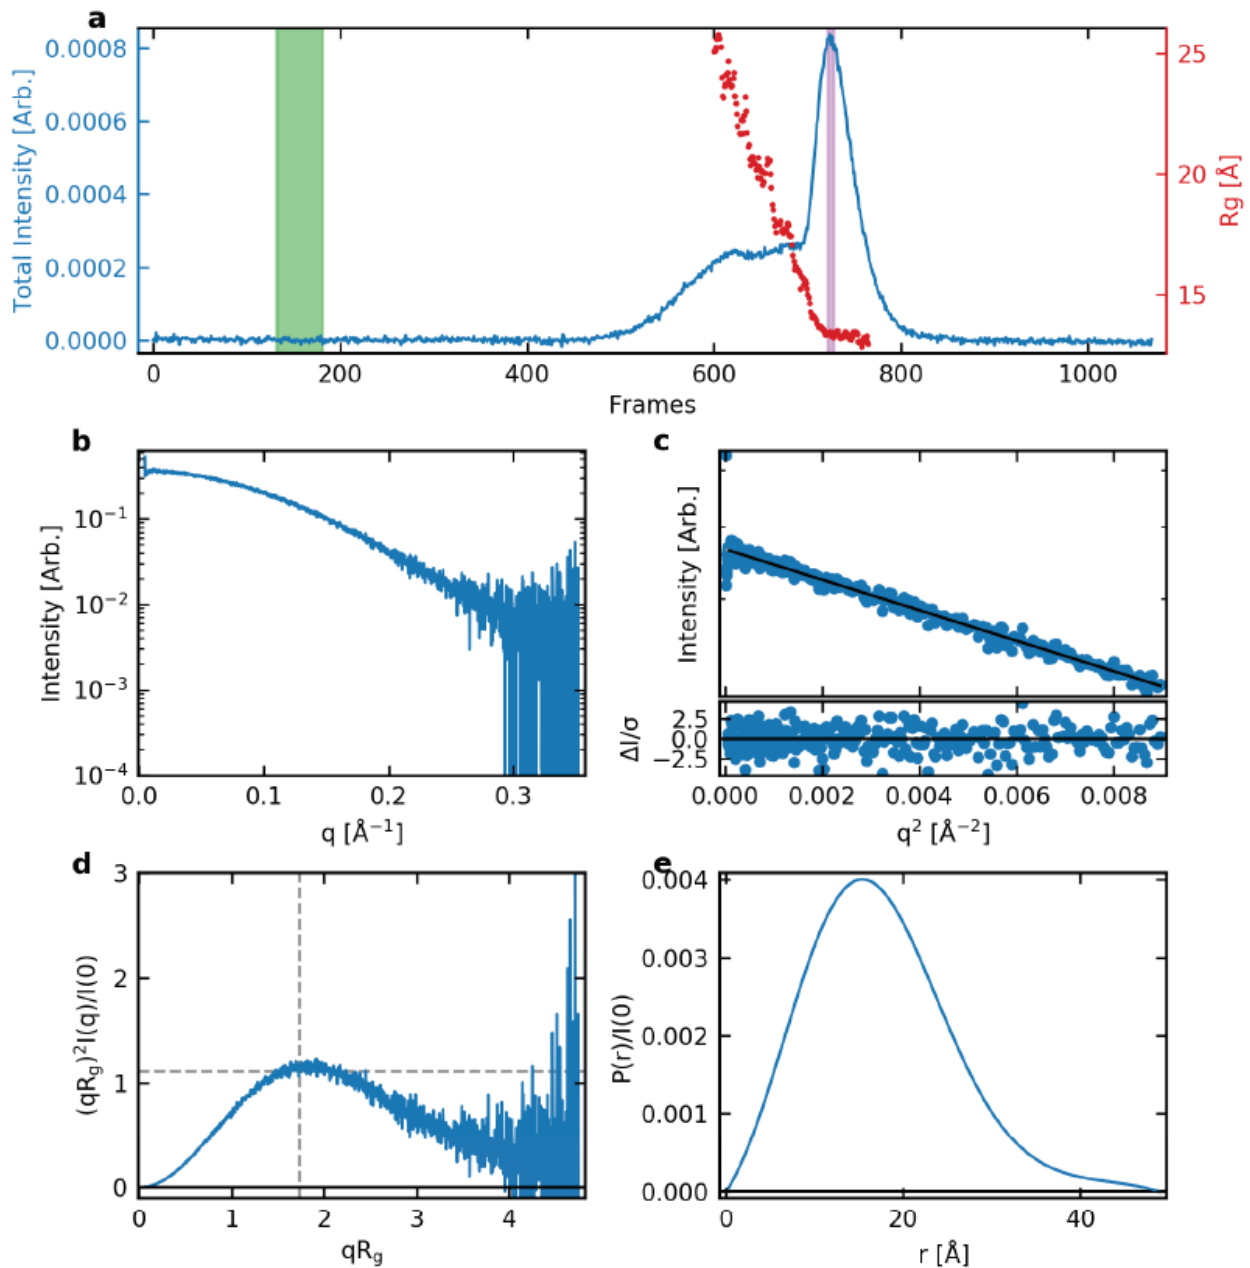

S17. SAXS data summary for 5I2V. a) Series intensity (blue, left axis) vs. frame, and, if available,  $R_g$  vs. frame (red, right axis). Green shaded regions are buffer regions, purple shaded regions are sample regions. b) Scattering profile(s) on a log-lin scale. c) Guinier fit(s) (top) and fit residuals (bottom). d) Normalized Kratky plot. Dashed lines show where a globular system would peak. e)  $P(r)$  function(s), normalized by  $I(0)$ . Figure created in BioXTAS RAW v2.1.1.

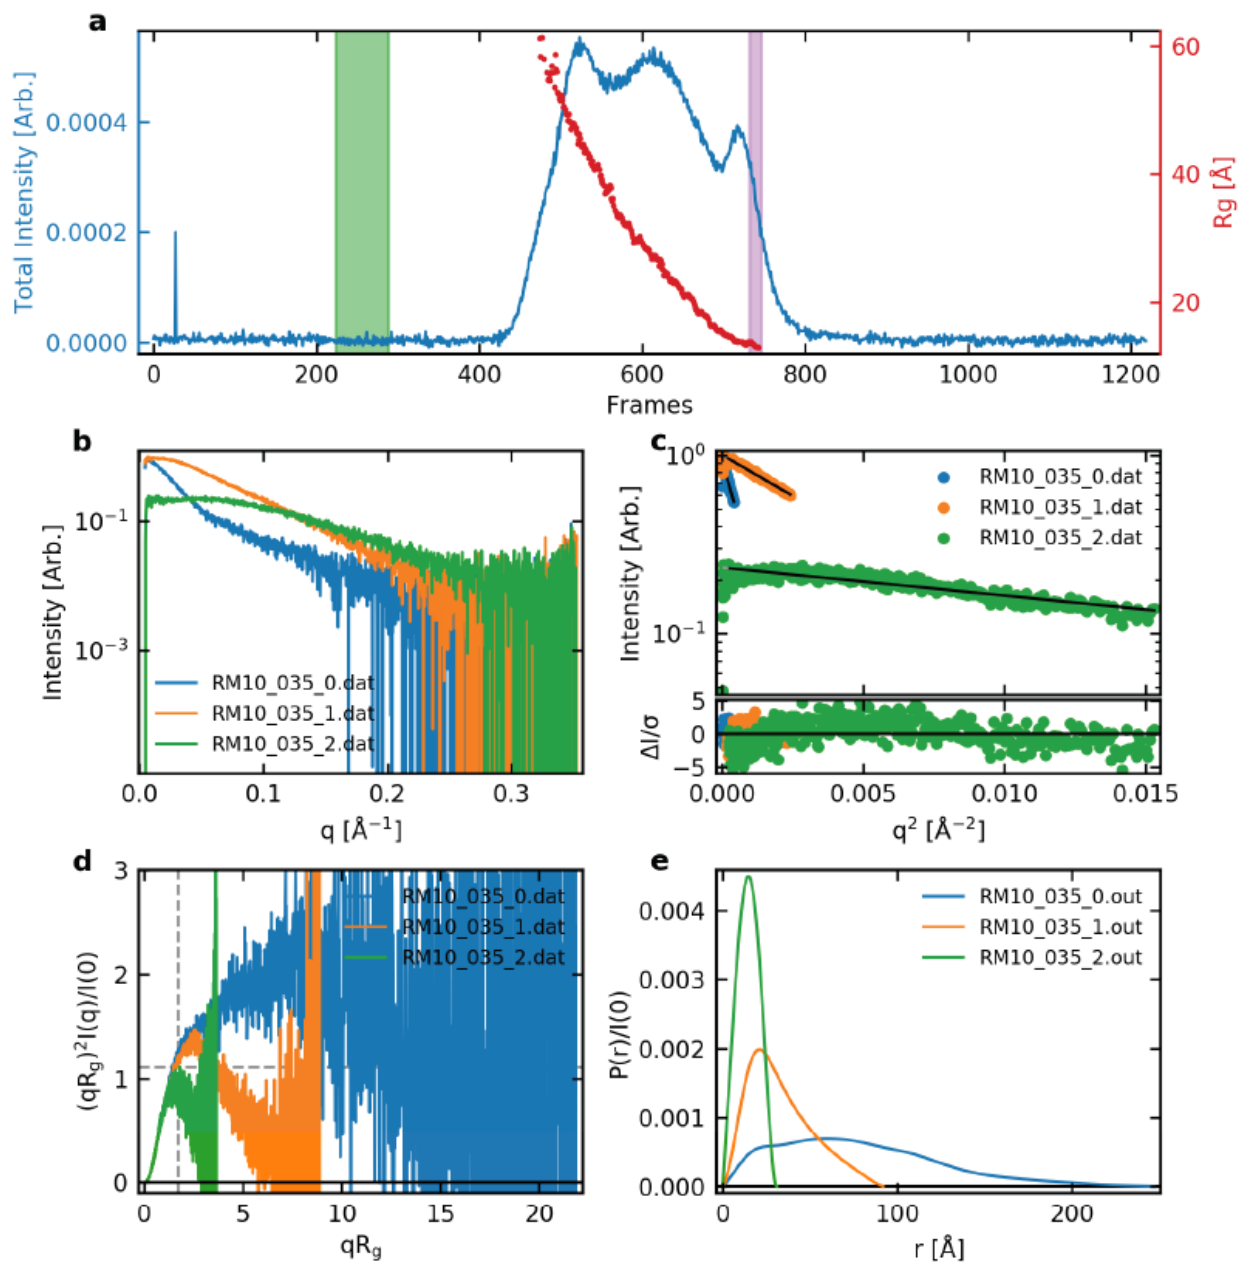

S18. SAXS data summary for 6GH0. a) Series intensity (blue, left axis) vs. frame, and, if available,  $R_g$  vs. frame (red, right axis). Green shaded regions are buffer regions, purple shaded regions are sample regions. b) Scattering profile(s) on a log-lin scale. c) Guinier fit(s) (top) and fit residuals (bottom). d) Normalized Kratky plot. Dashed lines show where a globular system would peak. e)  $P(r)$  function(s), normalized by  $I(0)$ . Green (035\_2), orange (031\_1), and blue (031\_0) species are the result of deconvolution using evolving factor analysis(1). The monomeric species, as determined by approximate molecular weight ( $V_c$ ), is shown in green. Figure created in BioXTAS RAW v2.1.1.



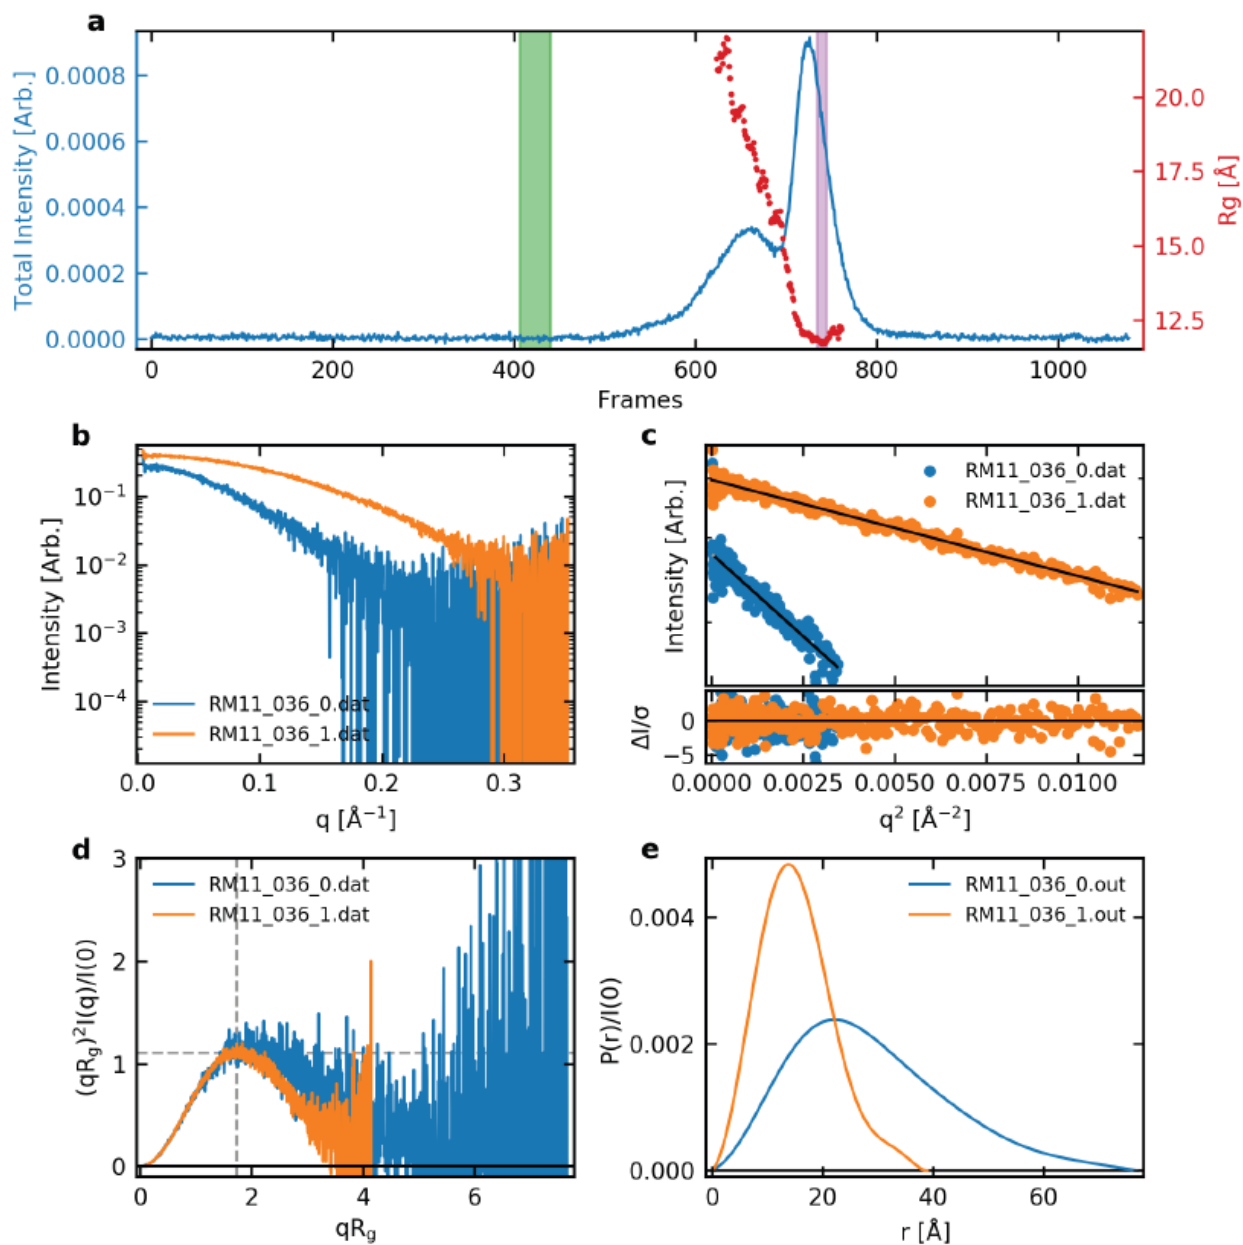

S19. SAXS data summary for 6L92. a) Series intensity (blue, left axis) vs. frame, and, if available,  $R_g$  vs. frame (red, right axis). Green shaded regions are buffer regions, purple shaded regions are sample regions. b) Scattering profile(s) on a log-lin scale. c) Guinier fit(s) (top) and fit residuals (bottom). d) Normalized Kratky plot. Dashed lines show where a globular system would peak. e)  $P(r)$  function(s), normalized by  $I(0)$ . Orange (031\_1), and blue (031\_0) species are the result of deconvolution using evolving factor analysis(1). The monomeric species, as determined by approximate molecular weight ( $V_c$ ), is shown in orange. Figure created in BioXTAS RAW v2.1.1.

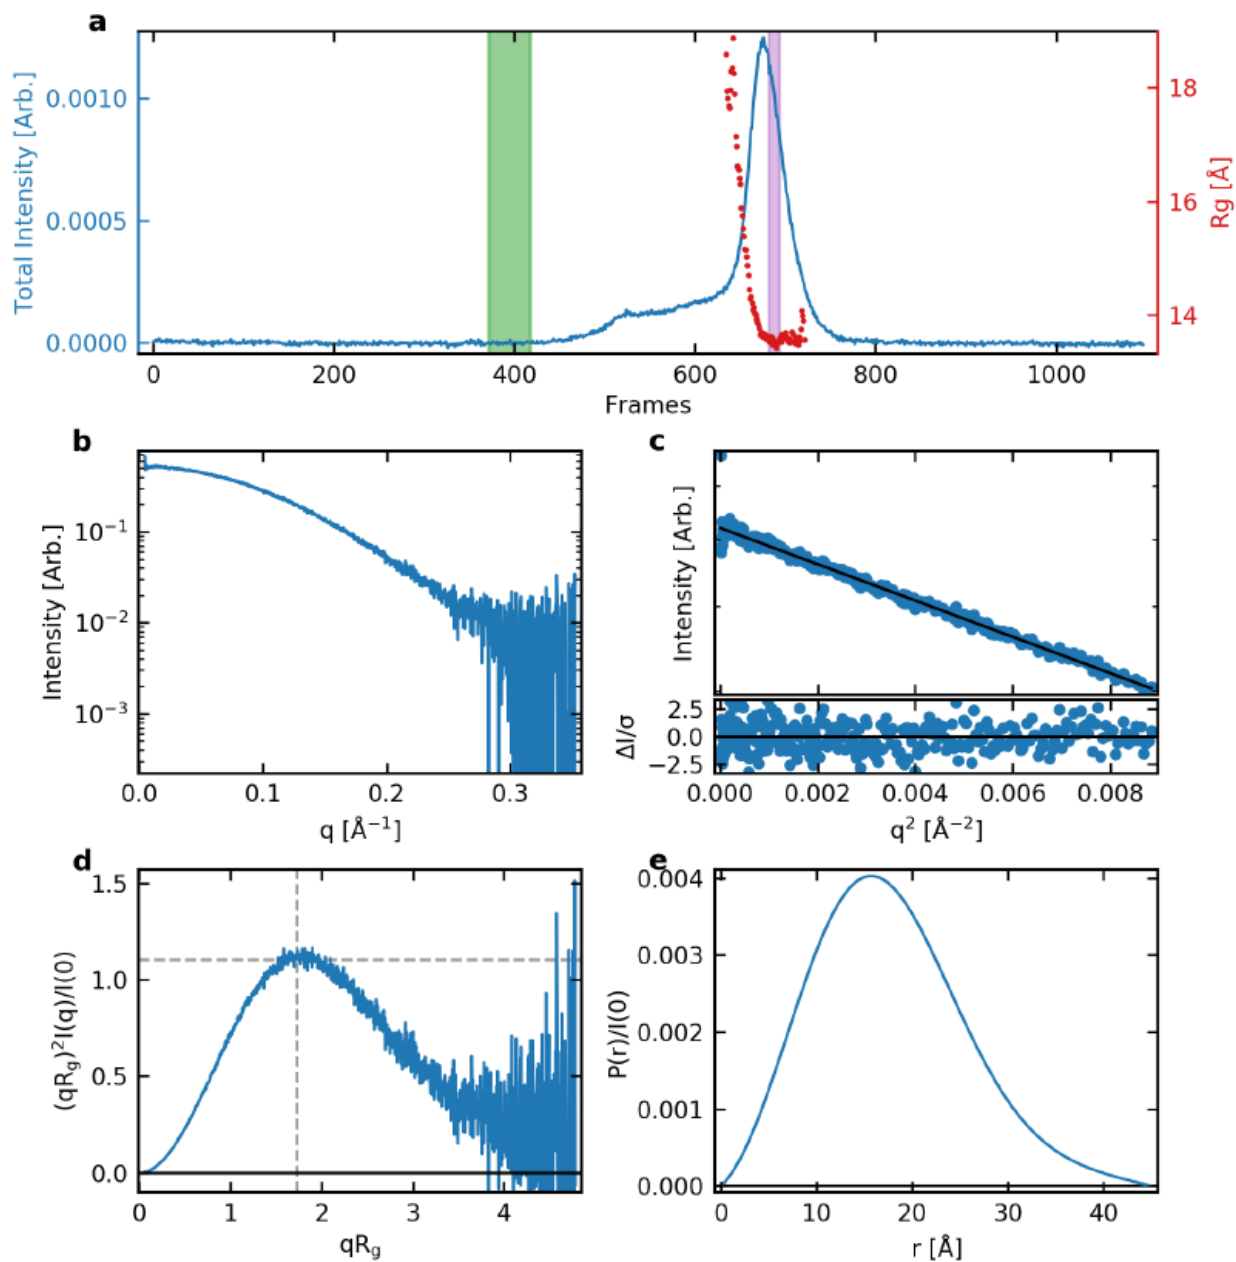

S20. SAXS data summary for 6NEB. a) Series intensity (blue, left axis) vs. frame, and, if available,  $R_g$  vs. frame (red, right axis). Green shaded regions are buffer regions, purple shaded regions are sample regions. b) Scattering profile(s) on a log-lin scale. c) Guinier fit(s) (top) and fit residuals (bottom). d) Normalized Kratky plot. Dashed lines show where a globular system would peak. e)  $P(r)$  function(s), normalized by  $I(0)$ . Figure created in BioXTAS RAW v2.1.1.

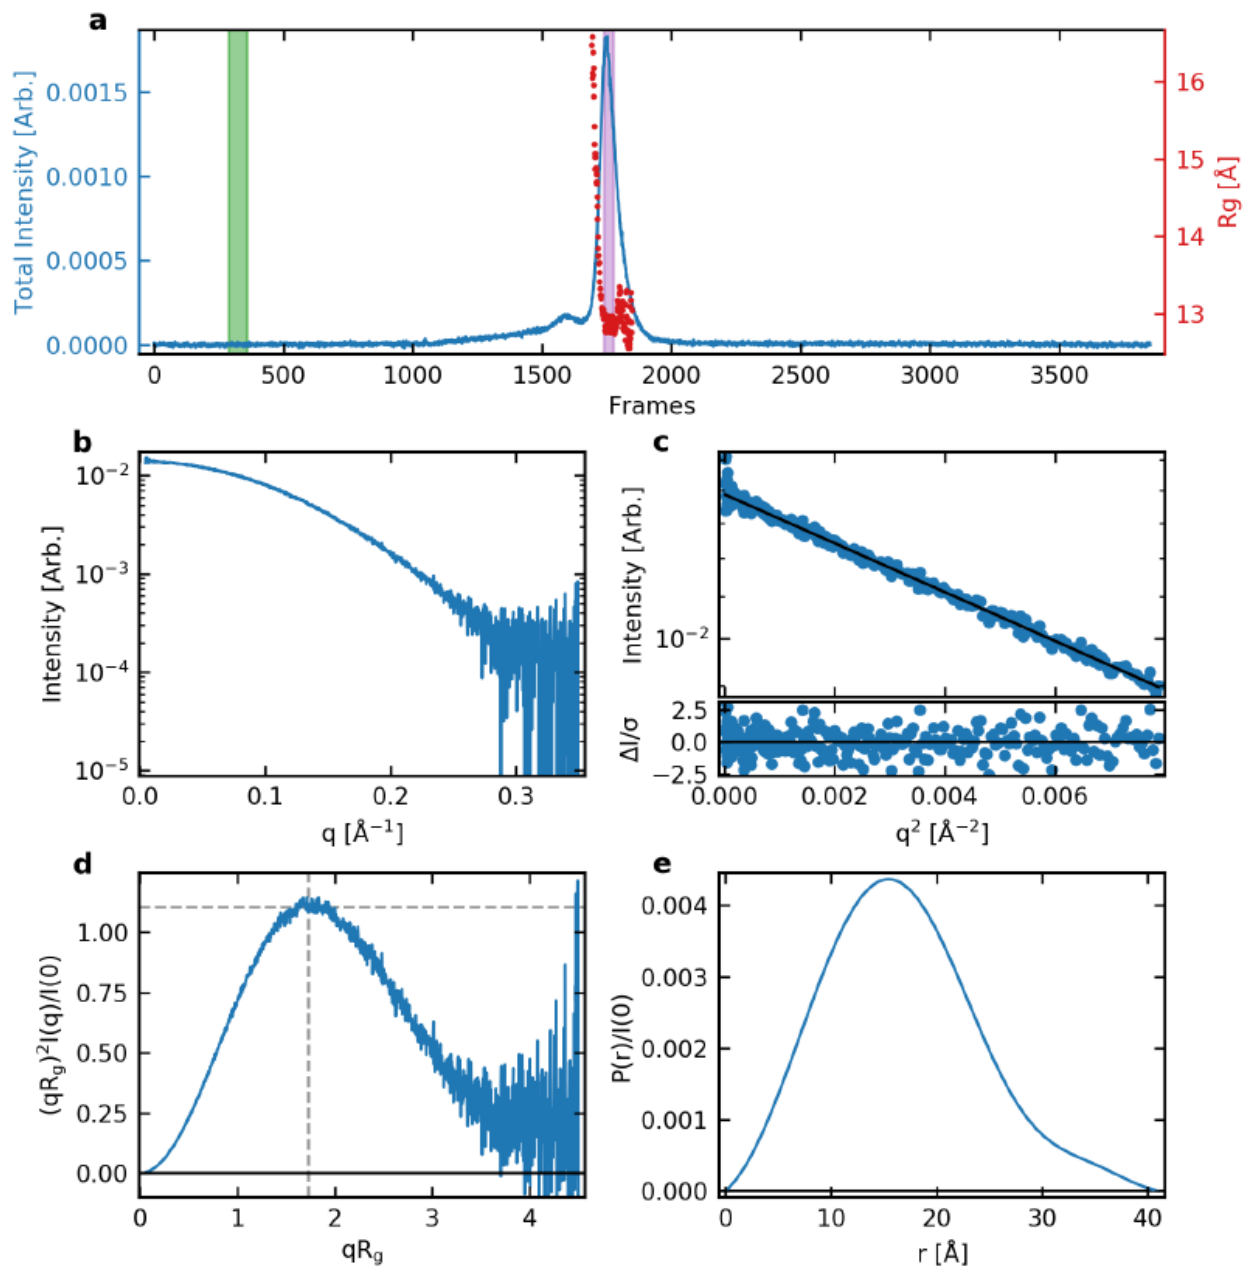

S21. SAXS data summary for 201D. a) Series intensity (blue, left axis) vs. frame, and, if available, Rg vs. frame (red, right axis). Green shaded regions are buffer regions, purple shaded regions are sample regions. b) Scattering profile(s) on a log-lin scale. c) Guinier fit(s) (top) and fit residuals (bottom). d) Normalized Kratky plot. Dashed lines show where a globular system would peak. e) P(r) function(s), normalized by I(0). Figure created in BioXTAS RAW v2.1.1.

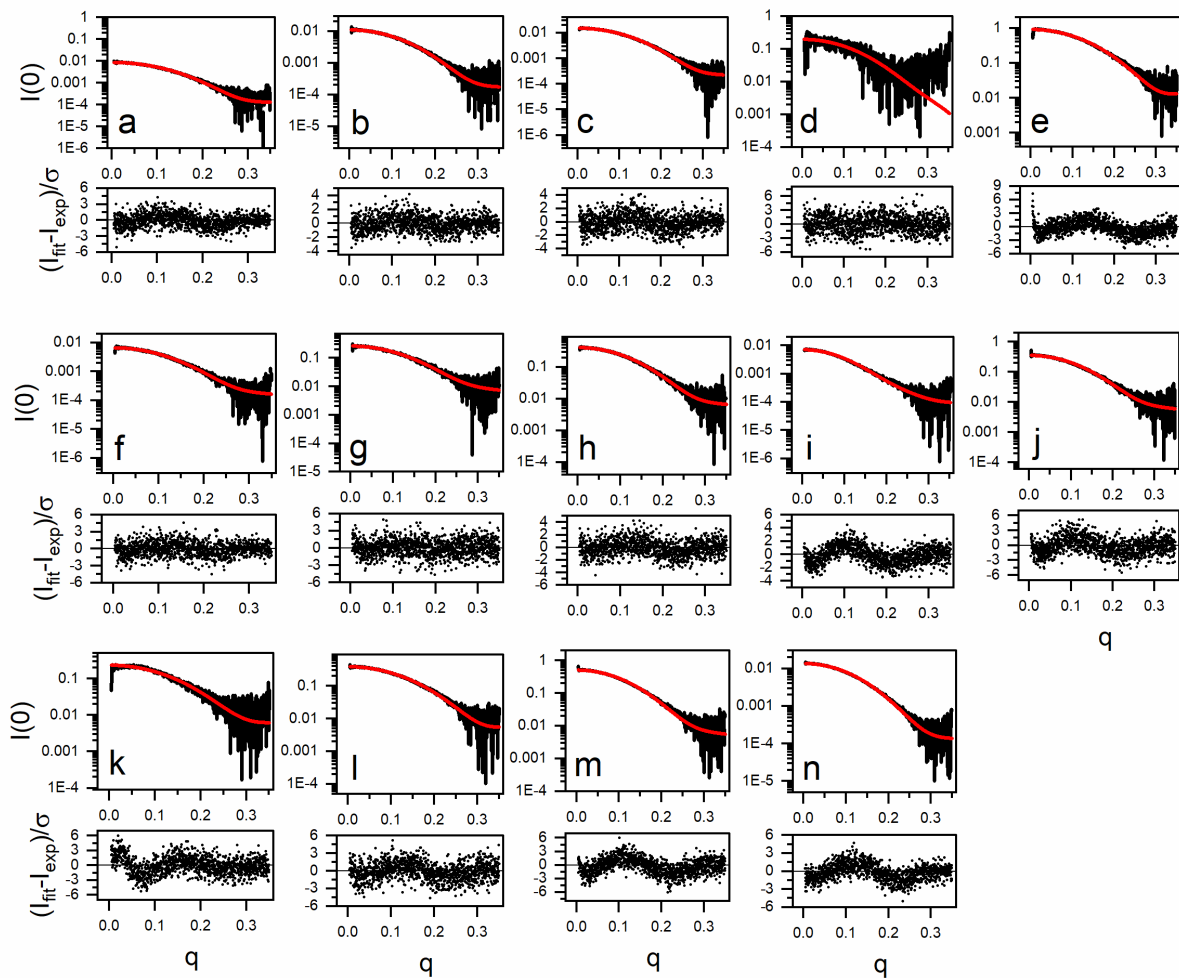

Figure S22. CRYSOLOG v2.8.3 fits of the 14 G4s from the PDB used in building the  $R_g$  regression. PDB ID's are: (a) 1XAV, (b) 2GKU, (c) 2JSL, (d) 2KQG, (e) 2KZD, (f) 2KZE, (g) 2LBY, (h) 2M27, (i) 5CMX, (j) 5I2V, (k) 6GH0, (l) 6L92, (m) 6NEB, (n) 201D. Tabulated results for the fits are given in Table S4.







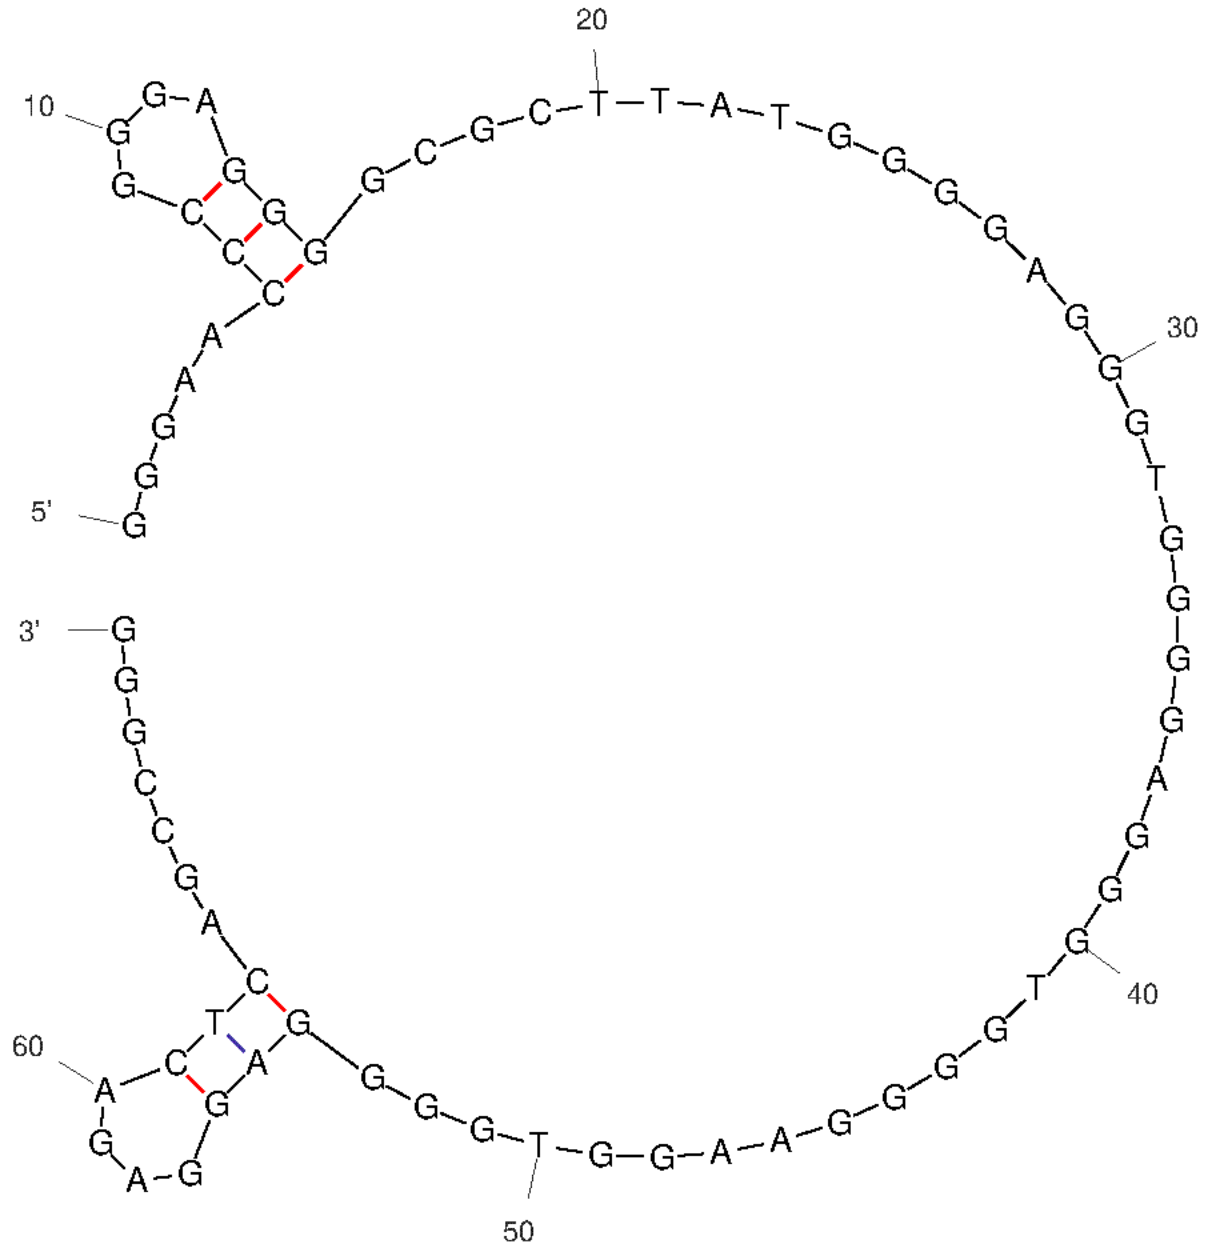

$dG = -5.06$  cMyc12

Figure S26. Mfold analysis of cMyc-12.



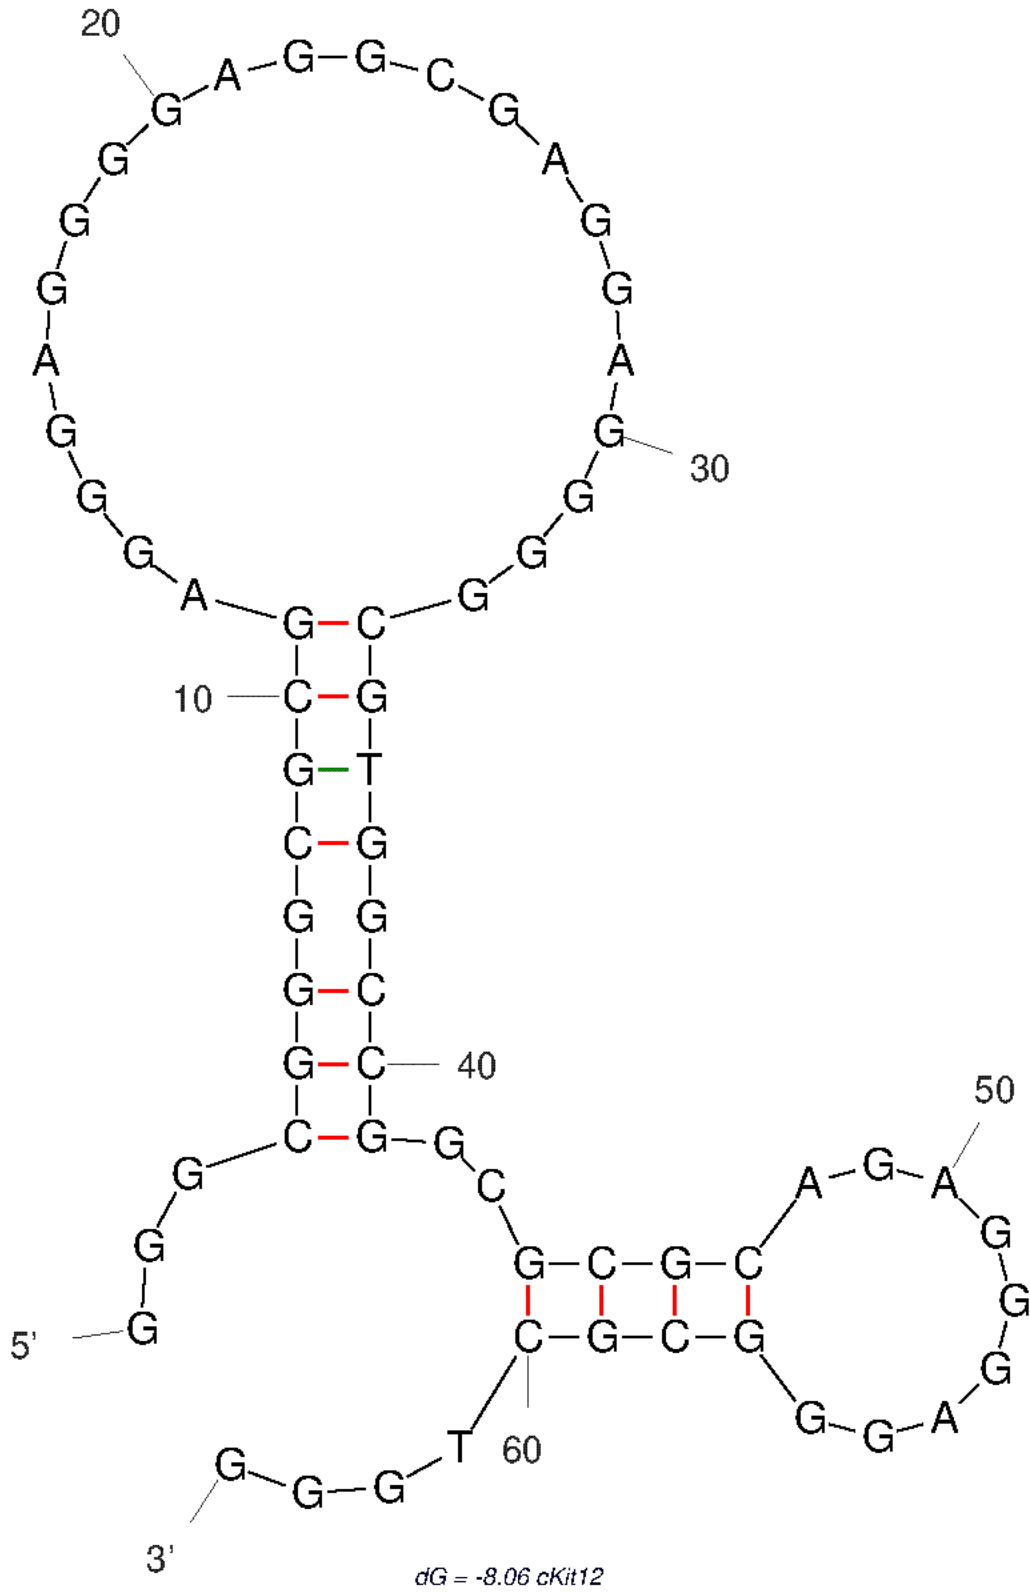

Figure S27. Mfold analysis of cKit-12.

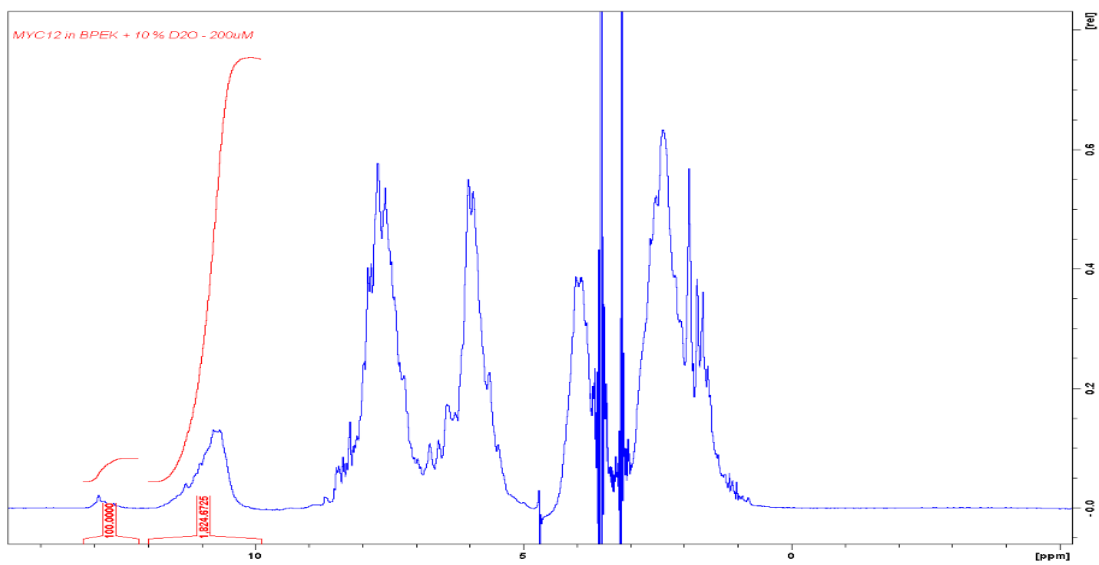

Figure S28. 1D proton NMR analysis of MYC-12. Red lines are integrations of the Watson-Crick and G-quadruplex imino proton regions, yielding a ratio of ~18:1 G-tetrad imino protons to duplex (Watson-Crick face) imino protons.

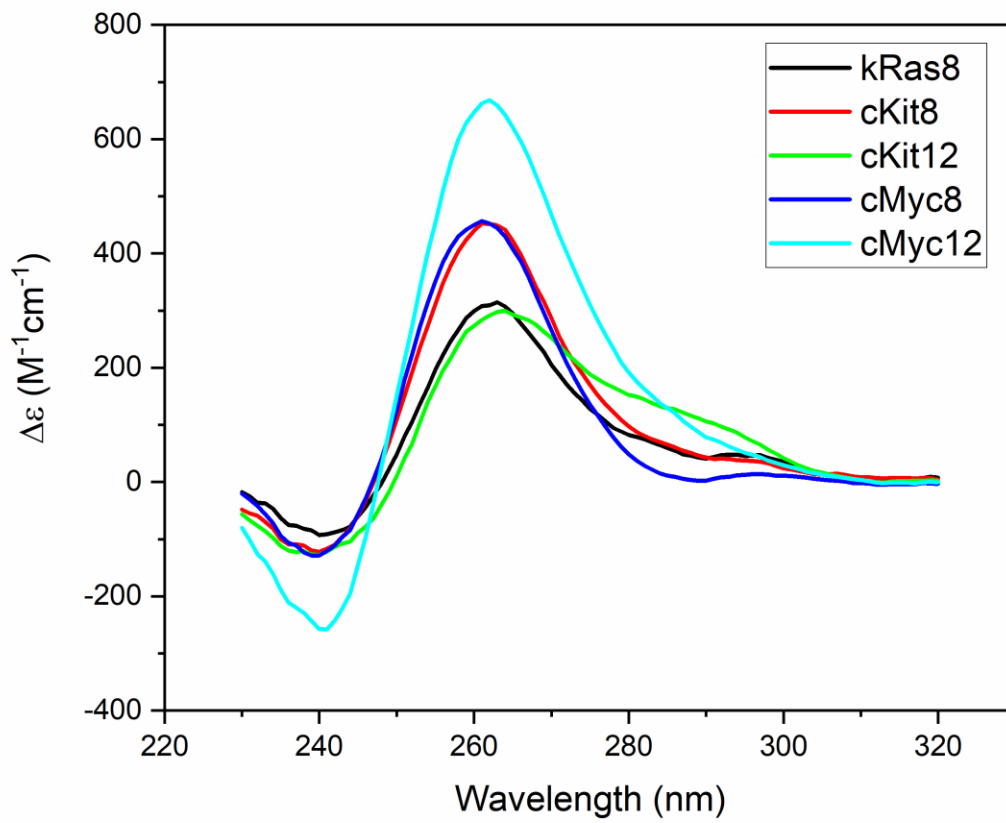

Figure S29. CD spectra of extended promoter sequences with 5' flanking nucleotides.

## REFERENCES

1. Meisburger, S.P., Taylor, A.B., Khan, C.A., Zhang, S., Fitzpatrick, P.F. and Ando, N. (2016) Domain Movements upon Activation of Phenylalanine Hydroxylase Characterized by Crystallography and Chromatography-Coupled Small-Angle X-ray Scattering. *Journal of the American Chemical Society*, **138**, 6506-6516.
2. Dexheimer, T.S., Sun, D. and Hurley, L.H. (2006) Deconvoluting the structural and drug-recognition complexity of the G-quadruplex-forming region upstream of the bcl-2 P1 promoter. *J Am Chem Soc*, **128**, 5404-5415.
3. Guo, K., Gokhale, V., Hurley, L.H. and Sun, D. (2008) Intramolecularly folded G-quadruplex and i-motif structures in the proximal promoter of the vascular endothelial growth factor gene. *Nucleic Acids Res*, **36**, 4598-4608.
4. De Armond, R., Wood, S., Sun, D., Hurley, L.H. and Ebbinghaus, S.W. (2005) Evidence for the presence of a guanine quadruplex forming region within a polypurine tract of the hypoxia inducible factor 1alpha promoter. *Biochemistry*, **44**, 16341-16350.
5. Palumbo, S.L., Memmott, R.M., Uribe, D.J., Krotova-Khan, Y., Hurley, L.H. and Ebbinghaus, S.W. (2008) A novel G-quadruplex-forming GGA repeat region in the c-myc promoter is a critical regulator of promoter activity. *Nucleic Acids Res*, **36**, 1755-1769.
6. Qin, Y., Rezler, E.M., Gokhale, V., Sun, D. and Hurley, L.H. (2007) Characterization of the G-quadruplexes in the duplex nuclease hypersensitive element of the PDGF-A promoter and modulation of PDGF-A promoter activity by TMPyP4. *Nucleic Acids Res*, **35**, 7698-7713.
7. Mitchell, T., Ramos-Montoya, A., Di Antonio, M., Murat, P., Ohnmacht, S., Micco, M., Jurmeister, S., Fryer, L., Balasubramanian, S., Neidle, S. *et al.* (2013) Downregulation of androgen receptor transcription by promoter g-quadruplex stabilization as a potential alternative treatment for castrate-resistant prostate cancer. *Biochemistry*, **52**, 1429-1436.
8. Tong, X., Lan, W., Zhang, X., Wu, H., Liu, M. and Cao, C. (2011) Solution structure of all parallel G-quadruplex formed by the oncogene RET promoter sequence. *Nucleic Acids Res*, **39**, 6753-6763.
9. Greco, M.L., Kotar, A., Rigo, R., Cristofari, C., Plavec, J. and Sissi, C. (2017) Coexistence of two main folded G-quadruplexes within a single G-rich domain in the EGFR promoter. *Nucleic Acids Res*, **45**, 10132-10142.
10. Sengar, A., Vandana, J.J., Chambers, V.S., Di Antonio, M., Winnerdy, F.R., Balasubramanian, S. and Phan, A.T. (2019) Structure of a (3+1) hybrid G-quadruplex in the PARP1 promoter. *Nucleic Acids Res*, **47**, 1564-1572.
11. Wang, J.M., Huang, F.C., Kuo, M.H., Wang, Z.F., Tseng, T.Y., Chang, L.C., Yen, S.J., Chang, T.C. and Lin, J.J. (2014) Inhibition of cancer cell migration and invasion through suppressing the Wnt1-mediating signal pathway by G-quadruplex structure stabilizers. *J Biol Chem*, **289**, 14612-14623.
12. Kuo, M.H., Wang, Z.F., Tseng, T.Y., Li, M.H., Hsu, S.T., Lin, J.J. and Chang, T.C. (2015) Conformational transition of a hairpin structure to G-quadruplex within the WNT1 gene promoter. *J Am Chem Soc*, **137**, 210-218.
13. Yafe, A., Etzioni, S., Weisman-Shomer, P. and Fry, M. (2005) Formation and properties of hairpin and tetraplex structures of guanine-rich regulatory sequences of muscle-specific genes. *Nucleic Acids Res*, **33**, 2887-2900.
14. Huang, M.C., Chu, I.T., Wang, Z.F., Lin, S., Chang, T.C. and Chen, C.T. (2018) A G-Quadruplex Structure in the Promoter Region of CLIC4 Functions as a Regulatory Element for Gene Expression. *Int J Mol Sci*, **19**.
15. Zhu, J., Fleming, A.M. and Burrows, C.J. (2018) The RAD17 Promoter Sequence Contains a Potential Tail-Dependent G-Quadruplex That Downregulates Gene Expression upon Oxidative Modification. *ACS Chem Biol*, **13**, 2577-2584.

16. Redstone, S.C.J., Fleming, A.M. and Burrows, C.J. (2019) Oxidative Modification of the Potential G-Quadruplex Sequence in the PCNA Gene Promoter Can Turn on Transcription. *Chem Res Toxicol*, **32**, 437-446.
17. Huang, W., Smaldino, P.J., Zhang, Q., Miller, L.D., Cao, P., Stadelman, K., Wan, M., Giri, B., Lei, M., Nagamine, Y. *et al.* (2012) Yin Yang 1 contains G-quadruplex structures in its promoter and 5'-UTR and its expression is modulated by G4 resolvase 1. *Nucleic Acids Res*, **40**, 1033-1049.
18. Ohnmacht, S.A., Micco, M., Petrucci, V., Todd, A.K., Reszka, A.P., Gunaratnam, M., Carvalho, M.A., Zloh, M. and Neidle, S. (2012) Sequences in the HSP90 promoter form G-quadruplex structures with selectivity for disubstituted phenyl bis-oxazole derivatives. *Bioorg Med Chem Lett*, **22**, 5930-5935.
19. Wei, P.C., Wang, Z.F., Lo, W.T., Su, M.I., Shew, J.Y., Chang, T.C. and Lee, W.H. (2013) A cis-element with mixed G-quadruplex structure of NPGPx promoter is essential for nucleolin-mediated transactivation on non-targeting siRNA stress. *Nucleic Acids Res*, **41**, 1533-1543.
20. Zhao, Y. and Uhler, J.P. (2018) Identification of a G-quadruplex forming sequence in the promoter of UCP1. *Acta Biochim Biophys Sin (Shanghai)*, **50**, 718-722.
21. Stevens, A.J. and Kennedy, M.A. (2017) Structural Analysis of G-Quadruplex Formation at the Human MEST Promoter. *PLoS One*, **12**, e0169433.
22. Purohit, G., Mukherjee, A.K., Sharma, S. and Chowdhury, S. (2018) Extratelomeric Binding of the Telomere Binding Protein TRF2 at the PCGF3 Promoter Is G-Quadruplex Motif-Dependent. *Biochemistry*, **57**, 2317-2324.
23. Farhath, M.M., Thompson, M., Ray, S., Sewell, A., Balci, H. and Basu, S. (2015) G-Quadruplex-Enabling Sequence within the Human Tyrosine Hydroxylase Promoter Differentially Regulates Transcription. *Biochemistry*, **54**, 5533-5545.
24. Schlag, K., Steinhilber, D., Karas, M. and Sorg, B.L. (2020) Analysis of proximal ALOX5 promoter binding proteins by quantitative proteomics. *FEBS J*, **287**, 4481-4499.
25. Salvati, E., Zizza, P., Rizzo, A., Iachettini, S., Cingolani, C., D'Angelo, C., Porru, M., Randazzo, A., Pagano, B., Novellino, E. *et al.* (2014) Evidence for G-quadruplex in the promoter of vegfr-2 and its targeting to inhibit tumor angiogenesis. *Nucleic Acids Res*, **42**, 2945-2957.
26. Basundra, R., Kumar, A., Amrane, S., Verma, A., Phan, A.T. and Chowdhury, S. (2010) A novel G-quadruplex motif modulates promoter activity of human thymidine kinase 1. *FEBS J*, **277**, 4254-4264.
27. Waller, Z.A., Howell, L.A., Macdonald, C.J., O'Connell, M.A. and Searcey, M. (2014) Identification and characterisation of a G-quadruplex forming sequence in the promoter region of nuclear factor (erythroid-derived 2)-like 2 (Nrf2). *Biochem Biophys Res Commun*, **447**, 128-132.
28. Yan, J., Zhao, D., Dong, L., Pan, S., Hao, F. and Guan, Y. (2017) A novel G-quadruplex motif in the Human MET promoter region. *Biosci Rep*, **37**.
29. Mathad, R.I., Hatzakis, E., Dai, J. and Yang, D. (2011) c-MYC promoter G-quadruplex formed at the 5'-end of NHE III1 element: insights into biological relevance and parallel-stranded G-quadruplex stability. *Nucleic Acids Res*, **39**, 9023-9033.
30. Fernando, H., Reszka, A.P., Huppert, J., Ladame, S., Rankin, S., Venkitaraman, A.R., Neidle, S. and Balasubramanian, S. (2006) A conserved quadruplex motif located in a transcription activation site of the human c-kit oncogene. *Biochemistry*, **45**, 7854-7860.
31. Zhang, L., Tan, W., Zhou, J., Xu, M. and Yuan, G. (2017) Investigation of G-quadruplex formation in the FGFR2 promoter region and its transcriptional regulation by liensinine. *Biochim Biophys Acta Gen Subj*, **1861**, 884-891.
32. Kirby, N., Cowieson, N., Hawley, A.M., Mudie, S.T., McGillivray, D.J., Kusel, M., Samardzic-Boban, V. and Ryan, T.M. (2016) Improved radiation dose efficiency in solution SAXS using a sheath flow sample environment. *Acta Crystallogr D Struct Biol*, **72**, 1254-1266.

33. Hopkins, J.B., Gillilan, R.E. and Skou, S. (2017) BioXTAS RAW: improvements to a free open-source program for small-angle X-ray scattering data reduction and analysis. *J Appl Crystallogr*, **50**, 1545-1553.
34. Semenyuk, A.V. and Svergun, D.I. (1991) GNOM— a program package for small-angle scattering data processing. *Journal of Applied Crystallography*, **24**, 537-540.
35. Franke, D. and Svergun, D.I. (2009) DAMMIF, a program for rapid ab-initio shape determination in small-angle scattering. *J Appl Crystallogr*, **42**, 342-346.
36. Volkov, V.V. and Svergun, D.I. (2003) Uniqueness of ab initio shape determination in small-angle scattering. *Journal of Applied Crystallography*, **36**, 860-864.
37. Petoukhov, M.V., Franke, D., Shkumatov, A.V., Tria, G., Kikhney, A.G., Gajda, M., Gorba, C., Mertens, H.D., Konarev, P.V. and Svergun, D.I. (2012) New developments in the ATSAS program package for small-angle scattering data analysis. *J Appl Crystallogr*, **45**, 342-350.
38. Svergun, D.I. (1999) Restoring low resolution structure of biological macromolecules from solution scattering using simulated annealing. *Biophys J*, **76**, 2879-2886.
39. Svergun, D., Barberato, C. and Koch, M.H.J. (1995) CRY SOL - a Program to Evaluate X-ray Solution Scattering of Biological Macromolecules from Atomic Coordinates. *Journal of Applied Crystallography*, **28**, 768-773.
